# Supplementary material for: Application of high-resolution laser multi collector ICP-MS U–Pb dating to columbite-group minerals with compositional zonation: reassessment of matrix effects among columbite-group minerals
Source: Royal Society of Chemistry journal article supplement (doi:10.1039/d4ja00201f), 2024-01-01
Supplement: d4ja00201f1.pdf [file d4ja00201f1.pdf]

### Supplementary Table captions

**Table S1** Typical LA-ICP-MS instrumental parameters for U-Pb dating and chemical mapping of columbite-group minerals

**Table S2** Chemical compositions of the studied homogenous samples by EPMA

**Table S3** Chemical compositions of the studied heterogeneous sample JEQ-2 by EPMA

**Table S4** U-Pb data for the studied homogenous samples corrected by Coltan139

**Table S5** U-Pb data for the studied heterogeneous sample JEQ-2 corrected by Coltan139

**Table S6** U-Pb data for the studied heterogeneous sample JEQ-2 corrected by CT1
