# Supplementary material for: Application of high-resolution laser multi collector ICP-MS U–Pb dating to columbite-group minerals with compositional zonation: reassessment of matrix effects among columbite-group minerals
Source: Royal Society of Chemistry journal article supplement (doi:10.1039/d4ja00201f), 2024-01-01
Supplement: d4ja00201f2.xlsx [file d4ja00201f2.xlsx]

## Sheet: Table S1
Table S1 Typical LA-ICP-MS instrumental parameters for U-Pb dating and chemical mapping of columbite-group minerals
LA-Q-ICP-MS of CUGB
Laser ablation system
Make, Model & type	ASI RESOlution S155 LR 193 nm ArF excimer
Ablation cell	Laurin Technic, S-155
Laser wavelength	193 nm
Pulse width	20 ns
Energy density	U-Pb dating: 3 J·cm-2; Trace element mapping: 4 J·cm-2
Repetition rate	U-Pb dating: 5 Hz; Trace element mapping: 20 Hz
Spot size	U-Pb dating: 33 μm; Trace element mapping: 7 μm
Sampling mode / pattern	Single spot
Cell carrier gas flow (He)	0.3 L·min-1
Emhancement gas flow (N2)	3 ~ 6 mL·min-1
Background time	20 s
Ablation duration	30 ~ 40 s
Washout time	10 s
Q-ICP-MS Instrument
Make, Model & type	Agilent 7900 quadrupole ICPMS
Radio frequency power (W)	1350 W
Coolant gas flow (Ar)	15.00 L·min-1
Carrier gas flow (Ar)	0.90 ~ 1.05 L·min-1
Isotopes measured dewell time	U-Pb dating: 204Pb (20 ms), 206Pb (20 ms), 207Pb (30 ms), 208Pb (15 ms), 232Th (10 ms), 238U (15 ms), 202Hg (10 ms), 7Li (6 ms) , 9Be (6 ms), 47Ti (6 ms), 85Rb (6 ms), 88Sr (6 ms), 89Y (6 ms), 90Zr (6 ms), 118Sn (6 ms), 139La (6 ms), 140Ce (6 ms), 141Pr (6 ms), 146Nd (6 ms), 147Sm (6 ms), 151Eu (6 ms), 157Gd (6 ms), 159Tb (6 ms), 163Dy (6 ms), 165Ho (6 ms), 166Er (6 ms), 169Tm (6 ms), 173Yb (6 ms…
LA-SF-SC-ICP-MS of IGGCAS
Laser ablation system
Make, Model & type	Coherent, Geolas HD
Ablation cell	In-house cell, aerosol dispersion volume < 3 cm3
Laser wavelength	193 nm
Pulse width	20 ns
Energy density	2 J·cm-2
Repetition rate	6 Hz
Spot size	10 μm
Sampling mode / pattern	Single hole drilling, with two cleaning pulses
Carrier gas flow (He)	0.75 L·min-1
Background time	7 s
Ablation duration	30 s
SF-SC-ICP-MS Instrument
Make, Model & type	Thermo Fisher Scientific Element XR
Radio frequency power (W)	1320 W
Guard electron	Connected (Pt)
Cone combinations	Jet + X (Nickel)
Fore vacuum P (mbar)	2.2 × 10-3 (Jet + X)
High vacuum P (mbar)	2.2 × 10-7 (Jet + X)
Coolant gas flow (Ar)	15.00 L·min-1
Auxiliary gas flow (Ar)	0.80 L·min-1
Carrier gas flow (Ar)	0.95 L·min-1
Emhancement gas flow (N2)	8 mL·min-1
Isotopes measured dewell time	202Hg (2 ms), 204Pb (2 ms), 206Pb (15 ms), 207Pb (25 ms), 208Pb (2 ms), 232Th (2 ms), 235U (10 ms), 238U (10 ms)
Mass window	0.2
Detection system	Single secondary electron multiplier in triple mode, ion counter, analogue, and Faraday cups
LA-MC-ICP-MS of CUGB
Laser ablation system
Make, model, and type	ASI RESOlution S155 LR 193 nm ArF excimer
Ablation cell	Laurin Technic, S-155
Laser wavelength	193 nm
Pulse duration	20 ns
Energy density	3 J·cm-2
Repetition rate	5 Hz
Spot size	10 μm, 15 μm
Sampling mode	Spot analyses
Carrier gas flow (He)	0.3 L·min-1
Enhancement gas flow (N2)	3–5 mL·min-1
Background time	20 s
Ablation duration	30 s
Washout time	10 s
MC-ICP-MS instrument
Make, model, and type	Thermo Fisher, Neptune Plus
Radio frequency power	1300 W
Guard electrode	Connected (Pt)
Cone combinations	Jet + X (Nickel)
Fore vacuum P (mbar)	7.65 × 10-4
High vacuum P (mbar)	2.44 × 10-7
Plasma gas flow (Ar)	15.00 L·min-1
Auxiliary gas flow (Ar)	0.80 L·min-1
Make up gas flow (Ar)	0.9-1.1 L·min-1
Integration time	0.131 s
Detector configurations	U-Pb: IC4-202Hg, IC5-204(Pb + Hg), IC2-206Pb, IC1B-207Pb, IC6-208Pb, Center-223.15M, H3/IC7-232Th, H4/IC8-238U

## Sheet: Table S2
Table S2 Chemical compositions of the studied homogenous samples by EPMA
Coltan139	Spot 1	Spot 2	Spot 3	Spot 4	Spot 5	Spot 6	Spot 7	Spot 8	Spot 9	Spot 10	Spot 11	Spot 12	Spot 13	Spot 14	Spot 15	Spot 16	Spot 17	Spot 18	Spot 19	Spot 20	Average
wt. %
WO3	0.728	0.751	0.766	0.765	0.927	0.68	0.632	0.89	1.021	0.652	0.824	0.738	0.844	0.959	0.752	0.781	0.7	0.728	0.861	0.694	0.78465
Nb2O5	60.885	60.23	60.819	60.755	59.861	60.571	61.249	60.527	61.517	60.502	60.821	60.238	61.07	60.685	60.803	60.818	60.81	60.569	60.962	60.503	60.7097
Ta2O5	13.618	13.377	13.254	13.378	13.548	13.37	13.255	13.485	13.494	13.344	13.29	13.384	13.56	13.446	13.394	13.281	13.505	13.495	13.293	13.342	13.4056
TiO2	3.632	3.688	3.746	3.606	3.621	3.635	3.716	3.619	3.587	3.701	3.648	3.75	3.741	3.493	3.67	3.636	3.664	3.493	3.562	3.59	3.6399
SnO2	0.686	0.792	0.7	0.688	0.609	0.693	0.683	0.688	0.636	0.79	0.733	0.686	0.693	0.69	0.625	0.65	0.706	0.642	0.671	0.696	0.68785
Sc2O3	1.035	1.047	1.057	1.02	1.031	1.059	1.044	1.006	1.041	1.038	1.018	1.068	1.06	1.037	1.005	1.077	1.048	1.057	1.017	1.051	1.0408
FeO	10.409	10.426	9.932	10.146	10.339	10.431	10.225	10.378	10.407	10.223	10.601	10.264	10.552	10.08	10.597	10.636	10.737	10.086	10.204	10.655	10.3664
MnO	9.258	9.087	8.892	9.156	8.751	8.889	8.727	9.067	8.959	8.912	9.008	8.721	9.013	8.851	8.919	8.943	8.707	9.17	9.015	8.585	8.9315
ZrO2	0.269	0.225	0.336	0.318	0.254	0.239	0.248	0.378	0.238	0.31	0.213	0.317	0.254	0.296	0.333	0.283	0.364	0.304	0.287	0.327	0.28965
HfO2	0.011	0.034	0	0	0.101	0.113	0.011	0	0.197	0.186	0.146	0.034	0.118	0.253	0.084	0	0	0.022	0.208	0	0.0759
ThO2	0	0.04	0	0	0.028	0.032	0	0.016	0.015	0.001	0	0.041	0.025	0	0.008	0.004	0	0	0	0.028	0.0119
UO2	0.198	0.248	0.288	0.142	0.128	0.211	0.29	0.206	0.191	0.224	0.231	0.23	0.204	0.17	0.151	0.216	0.242	0.165	0.14	0.194	0.20345
Total	100.729	99.945	99.79	99.974	99.198	99.923	100.08	100.26	101.303	99.883	100.533	99.471	101.134	99.96	100.341	100.325	100.483	99.731	100.22	99.665	100.147
Mn/(Fe + Mn)	0.469774	0.464727	0.471412	0.473391	0.457447	0.459132	0.459518	0.465327	0.461653	0.464781	0.45842	0.458402	0.459709	0.466577	0.45605	0.455805	0.446842	0.47525	0.468104	0.44525	0.461879
Ta/(Nb + Ta)	0.207648	0.206492	0.203401	0.205086	0.209598	0.205483	0.202274	0.207004	0.204462	0.205352	0.203836	0.206556	0.206449	0.206102	0.205152	0.203734	0.206482	0.207012	0.203497	0.205324	0.205547
DKLS-27	Spot 1	Spot 2	Spot 3	Spot 4	Spot 5	Spot 6	Spot 7	Spot 8	Spot 9	Spot 10	Spot 11	Spot 12	Spot 13	Spot 14	Spot 15	Spot 16	Spot 17	Spot 18	Spot 19	Spot 20	Average
wt. %
WO3	0	0	0	0	0	0	0	0	0	0	0	0	0	0	0	0	0	0	0	0	0
Nb2O5	53.7	56.657	52.534	56.345	55.159	56.711	50.098	55.058	54.906	50.166	50.568	54.233	57.66	56.579	51.562	47.021	56.433	54.408	54.872	49.694	53.7182
Ta2O5	21.24	18.796	21.38	17.311	19.311	17.365	23.398	19.044	20.091	23.183	23.663	21.331	16.637	16.512	20.646	25.526	17.117	18.269	19.578	24.727	20.2563
TiO2	4.136	4.111	4.229	3.978	4.749	4.081	3.984	4.012	4.137	4.799	4.373	3.611	3.722	4.076	4.937	5.074	4.033	4.305	4.5	4.066	4.24565
SnO2	0.617	0.631	0.766	0.667	0.826	0.736	0.686	0.623	0.693	0.799	0.822	0.463	0.486	0.599	1.055	1.126	0.737	0.648	0.584	0.861	0.72125
Sc2O3	0.461	0.571	0.491	0.638	0.623	0.632	0.429	0.6	0.584	0.405	0.416	0.563	0.546	0.561	0.455	0.339	0.603	0.616	0.551	0.391	0.52375
FeO	13.856	13.533	13.779	13.533	13.41	13.356	13.53	13.54	13.296	13.44	13.571	13.42	13.169	13.277	13.629	13.221	13.218	13.516	13.617	13.596	13.4753
MnO	5.411	5.8	5.371	6.058	5.465	5.936	5.402	5.67	5.575	5.301	5.263	5.39	6.046	6.266	5.342	5.312	5.862	5.827	5.647	5.248	5.6096
ZrO2	0.52	0.393	0.355	0.295	0.63	0.541	0.574	0.321	0.486	0.677	0.358	0.226	0.358	0.455	0.626	0.547	0.318	0.507	0.545	0.555	0.46435
HfO2	0.165	0.144	0.023	0	0	0	0	0	0	0	0	0	0.186	0	0	0	0	0	0.021	0	0.02695
ThO2	0.035	0	0	0	0	0.012	0	0	0.016	0	0.089	0	0.042	0.039	0.054	0.027	0	0	0.081	0	0.01975
UO2	0.237	0.197	0.197	0.233	0.325	0.234	0.178	0.332	0.113	0.598	0.287	0.23	0.152	0.259	0.171	0.296	0.223	0.284	0.236	0.159	0.24705
Total	100.378	100.833	99.125	99.058	100.498	99.604	98.279	99.2	99.897	99.368	99.41	99.467	99.004	98.623	98.477	98.489	98.544	98.38	100.232	99.297	99.3082
Mn/(Fe + Mn)	0.280062	0.299193	0.27969	0.308398	0.288741	0.306869	0.284549	0.294355	0.294622	0.282072	0.278663	0.285759	0.313816	0.319784	0.280806	0.285834	0.30641	0.300432	0.292337	0.27772	0.293006
Ta/(Nb + Ta)	0.316675	0.279904	0.322879	0.264693	0.29088	0.264039	0.353681	0.288393	0.30008	0.351265	0.354121	0.315464	0.252655	0.254811	0.319335	0.388775	0.262203	0.282342	0.294804	0.368291	0.306265
JEQ-11	Spot 1	Spot 2	Spot 3	Spot 4	Spot 5	Spot 6	Spot 7	Spot 8	Spot 9	Spot 10	Spot 11	Spot 12	Spot 13	Spot 14	Spot 15	Spot 16	Spot 17	Spot 18	Spot 19	Average
wt. %
WO3	0	0	0	0	0	0.0158	0	0	0	0	0.0047	0	0.0362	0.0031	0	0	0	0	0.0304	0.00474737
Nb2O5	53.6174	58.361	58.6363	58.6664	59.6134	57.0931	57.9026	58.4168	59.4993	58.5342	58.6019	57.4187	58.1028	58.1246	57.8971	58.7572	56.695	58.0263	55.7716	57.8808
Ta2O5	25.6877	21.078	20.3056	20.6884	20.1502	22.6355	21.2073	21.0874	20.2596	21.2223	20.7586	21.2883	21.5597	21.3197	21.7049	21.5764	23.5214	21.7333	25.0852	21.73
TiO2	0.4311	0.5845	0.5605	0.5961	0.5525	0.4733	0.5291	0.612	0.5634	0.4467	0.59	0.5346	0.5311	0.6056	0.5021	0.4374	0.4828	0.62	0.4154	0.529905
SnO2	0.0141	0	0	0	0	0	0	0	0	0	0	0	0.0312	0	0	0.0393	0.0351	0.02	0	0.00735263
Sc2O3	0.0756	0.0354	0	0	0	0	0.0031	0	0	0	0	0	0	0	0.0343	0.0667	0.0707	0	0	0.0150421
FeO	10.3321	11.2193	12.0842	12.131	11.4625	10.7942	11.3845	11.9615	10.882	11.1937	10.6681	10.9511	11.494	12.3059	10.6564	11.0043	10.1541	11.3419	10.1969	11.1694
MnO	8.7021	8.1652	7.7147	7.4627	8.4649	8.5308	8.0694	7.5973	8.7601	8.3709	8.7248	8.5614	8.3273	7.3049	8.7412	8.4684	9.1797	8.1644	9.0853	8.33661
ZrO2	0.0074	0.0012	0	0	0	0.0208	0.0384	0.0005	0	0	0.0183	0.0411	0	0.0529	0.0007	0	0.0057	0.0003	0	0.00985789
HfO2	0	0	0	0	0	0	0	0	0	0	0	0	0	0	0	0	0	0	0	0
ThO2	0	0.0232	0.023	0.0103	0	0	0.0093	0	0	0	0	0.0106	0.0053	0	0.0081	0.0083	0	0	0.003	0.00532105
UO2	0.0165	0.0216	0.0245	0.0195	0.0375	0.0288	0.0022	0.0433	0.0029	0	0	0	0.0677	0.013	0	0.018	0.031	0.0216	0	0.0183211
Total	98.884	99.4894	99.3488	99.5744	100.281	99.5923	99.1459	99.7188	99.9673	99.7678	99.3664	98.8058	100.155	99.7297	99.5448	100.376	100.175	99.9278	100.588	99.7073
Mn/(Fe + Mn)	0.456222	0.42028	0.388733	0.379961	0.423842	0.440485	0.413857	0.387515	0.44503	0.426913	0.448939	0.437813	0.419177	0.37159	0.449676	0.433935	0.473836	0.417611	0.470212	0.426612
Ta/(Nb + Ta)	0.359525	0.297343	0.288635	0.292378	0.28369	0.317187	0.300276	0.297236	0.285182	0.29815	0.293308	0.302847	0.303021	0.300583	0.305192	0.300823	0.327098	0.304996	0.345121	0.305399
NP-2	Spot 1	Spot 2	Spot 3	Spot 4	Spot 5	Spot 6	Spot 7	Spot 8	Spot 9	Spot 10	Average
wt. %
WO3	1.2	1.232	1.319	1.33	0.976	1.354	1.512	1.199	1.305	1.261	1.2688
Nb2O5	39.839	39.677	39.978	39.293	42.111	40.318	39.386	39.387	39.69	40.462	40.0141
Ta2O5	38.946	40.303	39.946	40.29	37.718	39.596	39.599	40.472	39.868	40.349	39.7087
TiO2	0.359	0.384	0.316	0.403	0.143	0.367	0.335	0.351	0.291	0.332	0.3281
SnO2	0.543	0.552	0.511	0.549	0.199	0.538	0.52	0.515	0.55	0.476	0.4953
Sc2O3	0	0	0.043	0	0.005	0.058	0.032	0	0	0.042	0.018
FeO	10.748	10.548	10.714	10.417	10.827	10.401	10.407	10.468	10.516	10.475	10.5521
MnO	6.888	6.826	7.006	6.754	6.967	6.83	6.718	6.819	6.763	6.774	6.8345
ZrO2	0.29	0.292	0.225	0.304	0.017	0.327	0.161	0.47	0.336	0.371	0.2793
ThO2	0	0	0	0.123	0	0.057	0	0.012	0	0.026	0.0218
UO2	0	0	0	0	0	0	0	0	0	0.1	0.01
Total	98.813	99.814	100.058	99.463	98.963	99.846	98.67	99.693	99.319	100.668	99.5307
Mn/(Fe + Mn)	0.389644	0.391964	0.394448	0.392415	0.390615	0.395453	0.39137	0.393535	0.390479	0.391796	0.392172
Ta/(Nb + Ta)	0.533889	0.543412	0.539327	0.545744	0.512063	0.535033	0.540865	0.546269	0.540637	0.538831	0.537607

## Sheet: Table S3
Table S3 Chemical compositions of sample JEQ-2 with compositional zonation by EPMA
JEQ-2	WO3	Nb2O5	Ta2O5	TiO2	SnO2	Sc2O3	FeO	MnO	ZrO2	HfO2	ThO2	UO2	Total	Mn/(Fe + Mn)	Ta/(Nb + Ta)
wt. %
Spot 1	0.841	51.371	28.557	0.231	0.065	0.125	3.998	14.64	0	0	0.169	0	99.997	0.784839	0.394428
Spot 2	0.6	53.086	26.767	0.3	0.002	0.125	3.865	14.859	0.007	0	0	0.105	99.716	0.792946	0.371378
Spot 3	0.967	59.337	19.687	0.413	0.009	0.076	3.656	15.693	0.115	0.049	0.004	0.039	100.045	0.810456	0.279923
Spot 4	1.067	58.612	20.054	0.423	0	0.053	3.712	15.8	0	0	0.008	0.117	99.846	0.809161	0.286166
Spot 5	1.191	43.901	35.146	0.412	0	0.225	3.822	14.724	0	0.118	0.029	0.154	99.722	0.793284	0.484007
Spot 6	0.679	62.346	16.156	0.333	0.052	0.082	3.648	16.031	0.038	0.02	0	0	99.385	0.81404	0.232906
Spot 7	2.25204	17.1206	64.6937	0.3822	0	0.3724	3.14482	12.2657	0.12544	0.12054	0.01176	0.0588	100.548	0.795301	0.81575
Spot 8	0.986	48.289	31.273	0.447	0.032	0.194	4.159	14.398	0	0.086	0	0.031	99.895	0.775206	0.431431
Spot 9	0.295	71.009	6.955	0.317	0.094	0.038	4.256	16.229	0.145	0.125	0.017	0.165	99.645	0.791601	0.102946
Spot 10	1.80026	19.6235	62.3525	0.31164	0.01274	0.29694	3.2977	12.5411	0	0	0.02744	0.09212	100.356	0.791157	0.788267
Spot 11	2.13934	10.5507	71.3068	1.26616	0.11074	0.4067	3.32808	11.2563	0.2695	0	0	0.19208	100.826	0.771123	0.887877
Spot 12	0.754	55.711	23.2	0.202	0	0.137	4.651	14.504	0	0.098	0.05	0	99.307	0.756479	0.327923
Spot 13	2.09524	12.5499	70.5943	0.66346	0.08036	0.34496	3.26438	11.8805	0.06762	0.0098	0	0.12054	101.671	0.783802	0.868261
Spot 14	1.74244	14.0934	67.6886	0.48902	0.00882	0.39984	3.05564	12.152	0.19992	0.049	0.0392	0.36848	100.286	0.79845	0.849111
Spot 15	0.436	62.377	15.586	0.233	0.108	0.083	3.771	15.955	0	0.063	0.025	0	98.637	0.808232	0.226463
Spot 16	1.33452	34.0114	46.2597	0.76131	0.06336	0.26235	3.74616	13.4402	0.01386	0	0	0.22572	100.119	0.781368	0.614438
Spot 17	0.962	59.652	17.718	0.327	0.042	0.102	3.614	16.038	0	0.116	0	0.28	98.851	0.815519	0.258168
Spot 18	1.438	42.037	38.549	0.299	0.032	0.194	3.678	14.49	0	0	0	0	100.717	0.796931	0.517946
Spot 19	0.625	51.924	27.792	0.107	0.007	0.153	3.695	15.056	0.026	0	0	0	99.385	0.802331	0.385421
Spot 20	1.526	38.226	42.056	0.571	0.116	0.189	3.834	14.084	0	0	0	0.145	100.747	0.785374	0.563141
Spot 21	0.504	65.254	13.236	0.364	0.021	0.091	3.546	16.32	0.292	0.178	0.033	0.297	100.136	0.820936	0.192024
Spot 22	0.885	48.305	31.113	0.154	0	0.18	4.342	14.689	0	0.143	0	0	99.811	0.771164	0.430092
Spot 23	0.579	63.819	14.668	0.387	0.049	0.07	3.888	16.075	0.013	0	0	0.293	99.841	0.804632	0.212161
Spot 24	0.327	62.011	15.642	0.335	0.089	0.123	3.877	15.947	0.025	0	0.037	0.226	98.639	0.80382	0.228127
Spot 25	1.28799	36.9082	44.1441	0.25146	0.00198	0.3069	3.56697	14.1174	0.11088	0	0	0.0792	100.775	0.797675	0.583573
Spot 26	0.456	64.401	13.341	0.317	0.056	0.069	3.839	16.24	0.087	0	0.025	0.351	99.182	0.808206	0.195312
Spot 27	0.304	60.779	17.244	0.41	0.028	0.022	3.733	15.854	0.019	0	0	0.035	98.428	0.808817	0.249488
Spot 28	0.425	61.333	17.618	0.358	0.035	0.097	3.907	15.609	0	0	0.112	0.303	99.797	0.799185	0.251813
Spot 29	2.31084	13.2378	68.6911	0.70952	0.08036	0.35084	3.20754	11.7963	0.06664	0	0.00392	0.18914	100.644	0.785567	0.858753
Spot 30	1.734	27.763	53.885	0.302	0	0.262	3.309	13.345	0.051	0.084	0	0.015	100.75	0.800692	0.694572
Spot 31	1.55628	32.0621	49.0446	0.38412	0	0.24849	3.32838	13.5224	0	0	0.12375	0	100.27	0.801865	0.641869
Spot 32	0.421	63.259	15.635	0.468	0.016	0.096	3.745	15.78	0.213	0	0	0.008	99.641	0.807594	0.224559
Spot 33	1.66122	33.86	45.3539	0.75141	0.0693	0.22077	3.54222	13.5719	0.09108	0	0.08811	0.59103	99.8009	0.792388	0.610805
Spot 34	2.07999	15.5965	65.933	0.29403	0.05445	0.37224	3.26601	12.3988	0	0	0.07821	0.05544	100.129	0.790867	0.832022
Spot 35	1.62092	12.2706	70.414	0.6027	0.13034	0.3675	3.39864	11.8884	0.10388	0	0	0.07938	100.876	0.777008	0.870526
Spot 36	0.297	65.765	11.438	0.34	0	0.031	3.308	16.78	0.08	0	0.033	0	98.072	0.834792	0.169284
Spot 37	0.212	68.654	9.126	0.223	0	0.059	3.426	16.556	0	0	0.025	0.031	98.312	0.827995	0.134759
Spot 38	1.606	22.048	58.759	0.742	0.089	0.297	3.624	12.338	0.154	0.004	0.16	0.333	100.154	0.772281	0.757433
Spot 39	0.74052	57.6457	21.6523	0.41679	0.02772	0.1287	3.66102	15.8044	0.08316	0	0	0.03465	100.195	0.81133	0.3056
Spot 40	0.178	68.202	9.83	0.215	0.082	0.106	3.936	16.549	0.055	0	0	0.047	99.2	0.807258	0.144476
Spot 41	1.60426	17.0177	64.3468	0.4116	0.18326	0.34398	3.1164	12.4274	0.0147	0.1911	0	0.29498	99.9522	0.798887	0.815848
Spot 42	0.559	58.586	18.355	0.378	0.074	0.118	3.63	16.047	0.025	0.142	0	0.139	98.053	0.814938	0.268517
Spot 43	1.561	19.423	62.572	0.309	0.009	0.325	3.234	13.084	0.022	0	0.02	0.16	100.719	0.801198	0.790558
Spot 44	0.423	61.844	16.193	0.479	0.035	0.058	3.485	16.293	0.025	0.031	0.008	0.175	99.049	0.823232	0.234764
Spot 45	1.42296	25.678	55.8404	0.30086	0	0.34594	3.42902	13.0526	0	0	0	0.21364	100.283	0.791311	0.718149
Spot 46	0.864	58.947	18.598	0.595	0.019	0.103	3.615	15.949	0	0.013	0	0.159	98.862	0.814638	0.269896
Spot 47	0.353	69.952	8.354	0.145	0.054	0.062	3.686	16.861	0.03	0.029	0	0.149	99.675	0.820036	0.122751
Spot 48	1.8718	23.1995	59.9652	0.22638	0	0.22246	3.2144	12.9625	0	0	0.00784	0.15778	101.828	0.80068	0.751768
Spot 49	0.61875	50.3177	29.4594	0.35244	0.05049	0.14157	3.86595	14.8678	0.07227	0	0.07722	0.13266	99.9563	0.793003	0.406872
Spot 50	0.224	68.235	8.699	0.293	0.061	0.074	3.671	16.466	0.145	0	0.029	0.129	98.026	0.817121	0.12996
Spot 51	1.649	34.263	44.722	0.443	0.002	0.276	3.552	13.652	0.127	0.139	0	0.11	98.935	0.792902	0.604639
Spot 52	1.027	39.146	41.035	0.584	0.039	0.186	3.767	13.706	0	0.062	0.061	0.296	99.909	0.783755	0.55121
Spot 53	2.02664	11.8962	69.6672	0.91336	0	0.40082	3.2781	11.9629	0.16268	0	0.05782	0.16562	100.531	0.784261	0.8728
Spot 54	0.491	63.398	14.716	0.265	0	0.08	3.701	16.053	0	0	0	0.074	98.778	0.812056	0.213818
Spot 55	1.875	26.734	54.182	0.314	0	0.342	3.329	13.381	0.007	0	0	0.041	100.205	0.80016	0.703672
Spot 56	2.09385	13.6917	68.5021	0.5346	0.02574	0.30195	3.14424	11.9315	0.10395	0	0	0.14652	100.476	0.790798	0.854272
Spot 57	2.0196	19.1713	62.5165	0.49797	0.04653	0.29007	3.3264	12.5146	0.10989	0	0.09009	0.23859	100.822	0.789371	0.792563
Spot 58	0.409	53.673	26.105	0.514	0.094	0.133	3.793	15.064	0.026	0	0	0.058	99.869	0.798232	0.363004
Spot 59	1.193	36.339	44.756	0.139	0	0.27	3.656	13.85	0.042	0	0	0.023	100.268	0.790517	0.590678
Spot 60	1.2078	31.086	50.7623	0.2772	0	0.27423	3.67587	13.1383	0.02871	0	0.0792	0.05544	100.585	0.780721	0.656746
Spot 61	1.365	34.487	46.686	0.294	0.061	0.268	3.163	13.955	0.063	0	0.069	0	100.411	0.81464	0.613321
Spot 62	1.6	29.431	50.414	0.314	0.02	0.262	3.162	13.723	0.043	0	0	0.139	99.108	0.812144	0.667445
Spot 63	0.281	70.076	7.185	0.232	0	0.076	3.728	16.698	0.168	0	0.021	0	98.465	0.81691	0.107249
Spot 64	0.012	70.175	7.682	0.249	0.03	0.07	4.048	16.379	0.054	0	0	0.176	98.875	0.801215	0.113681
Spot 65	2.03938	29.939	51.1237	0.17248	0	0.23226	3.38786	13.378	0.26558	0.1176	0.0196	0.09212	100.768	0.797306	0.666749
Spot 66	0.34	68.783	8.922	0.196	0.067	0.094	3.923	16.311	0	0	0.045	0.097	98.778	0.805513	0.13193
Spot 67	1.013	33.42	48.814	0.201	0	0.236	3.436	13.351	0.042	0.017	0.032	0.071	100.633	0.794687	0.631183
Spot 68	1.519	31.1993	49.0755	0.8575	0.05488	0.24696	3.76222	12.9742	0.13916	0	0	0.12838	99.9571	0.774533	0.64826
Spot 69	1.312	43.87	36.179	0.338	0.005	0.199	3.681	14.444	0	0	0	0.099	100.127	0.796284	0.491421
Spot 70	1.63251	31.4137	48.703	0.71577	0.0396	0.21879	3.4749	13.171	0.27225	0	0.04356	0.61875	100.304	0.790606	0.644954
Spot 71	0.395	70.515	6.997	0.252	0	0.019	3.939	16.73	0	0	0	0	98.847	0.808827	0.104153
Spot 72	0.828	55.373	23.046	0.328	0.037	0.142	4.186	14.88	0.026	0	0	0.077	98.923	0.779783	0.327797
Spot 73	1.7003	22.786	58.606	0.32242	0.0196	0.33222	3.24674	12.6645	0	0	0.01176	0.1421	99.8316	0.795318	0.750845
Spot 74	1.24068	34.4931	46.8126	0.1764	0	0.29302	3.82102	13.2908	0	0	0.00784	0	100.135	0.776031	0.613922
Spot 75	0.684	55.385	23.699	0.302	0.007	0.11	3.771	15.422	0.013	0	0.045	0.019	99.457	0.802911	0.333935
Spot 76	0.799	47.709	32.368	0.293	0.066	0.235	3.67	14.675	0.02	0	0	0.034	99.869	0.799326	0.442871
Spot 77	1.88944	13.8758	67.2672	0.6272	0.06272	0.40376	3.32122	12.2049	0.0294	0.05586	0	0.28028	100.018	0.785437	0.8503
Spot 78	1.892	22.218	58.1	0.451	0	0.306	3.265	12.781	0.116	0	0.032	0.163	99.324	0.795895	0.753932
Spot 79	1.56816	30.9494	49.3406	0.66231	0.06435	0.25146	3.78873	13.2106	0.09801	0	0	0.17721	100.111	0.776453	0.651316
Spot 80	0.827	51.351	28.681	0.079	0.021	0.174	3.738	14.941	0	0	0	0.004	99.816	0.799262	0.395556
Spot 81	1.87376	13.6338	67.8699	0.6272	0.01764	0.35378	3.18402	12.1794	0	0	0.04214	0.14308	99.9247	0.792117	0.853645
Spot 82	0.663	58.291	20.27	0.309	0	0.059	3.833	15.609	0.126	0	0	0.168	99.328	0.802236	0.289488
Spot 83	0.664	63.961	14.38	0.442	0.03	0.047	3.785	16.163	0	0	0.004	0.127	99.603	0.809661	0.208498
Spot 84	1.37886	29.2177	52.1144	0.28714	0.06272	0.28224	3.53976	13.18	0.06958	0	0	0.11662	100.249	0.787643	0.676361
Spot 85	0.162	70.04	6.896	0.188	0.079	0.095	4.251	16.252	0.059	0.016	0.062	0.085	98.185	0.792028	0.103429
Spot 86	1.53945	31.3721	49.8792	0.16038	0	0.25344	3.40857	13.3313	0	0	0	0	99.9445	0.795753	0.6507
Spot 87	0.472	57.734	21.7	0.247	0	0.105	3.65	15.853	0	0	0.02	0	99.781	0.81226	0.305742
Spot 88	0.7	58.999	20.335	0.356	0.034	0.113	3.853	15.777	0	0	0	0.115	100.282	0.803108	0.287667
Spot 89	1.69785	19.9881	61.3434	0.77517	0.01485	0.3168	3.76992	12.274	0.17424	0	0	0.07326	100.428	0.764329	0.782413
Average	1.10673	43.1717	36.6629	0.392598	0.0353994	0.196633	3.62475	14.3852	0.0581056	0.023336	0.0222973	0.125007	99.8047	0.797323	0.484095

## Sheet: Table S4
Table S4 U-Pb data for the studied homogenous samples corrected by Coltan139
Comments		Ratios							Age （Ma）
		207Pb/235U	2S	206Pb/238U	2S	207Pb/206Pb	2S		206Pb/238U Age	2S
LA-Q-ICP-MS @ 33 μm, 3 J·cm-2, 5 Hz 2021/04/11
DKLS-27-1		0.283	0.0059	0.03967	0.0005	0.05142	0.00074		250.8	3.1
DKLS-27-2		0.2829	0.007	0.03971	0.00057	0.05173	0.00094		251	3.5
DKLS-27-3		0.2836	0.0074	0.03978	0.00056	0.0512	0.0012		251.4	3.5
DKLS-27-4		0.2773	0.0087	0.0395	0.00065	0.0522	0.0014		249.7	4
DKLS-27-5		0.2789	0.0051	0.03937	0.00042	0.05184	0.00079		248.9	2.6
DKLS-27-6		0.2775	0.0091	0.03926	0.00079	0.051	0.0016		248.2	4.9
DKLS-27-7		0.2827	0.0065	0.03966	0.00066	0.0514	0.001		250.7	4.1
DKLS-27-8		0.2815	0.0056	0.03938	0.00054	0.05134	0.00095		249	3.4
DKLS-27-9		0.2749	0.0085	0.03939	0.00078	0.0506	0.0015		249	4.8
DKLS-27-10		0.2828	0.0056	0.03961	0.00055	0.05218	0.00091		250.4	3.4
DKLS-27-11		0.2769	0.0053	0.0396	0.00049	0.05116	0.00083		250.3	3.1
DKLS-27-12		0.2821	0.0074	0.03978	0.0006	0.0509	0.0012		251.5	3.7
DKLS-27-13		0.2789	0.0071	0.03978	0.00058	0.0506	0.0013		251.5	3.6
DKLS-27-14		0.2814	0.0048	0.03968	0.00037	0.05124	0.00071		250.8	2.3
DKLS-27-15		0.284	0.0077	0.0398	0.00053	0.0515	0.0011		251.6	3.3
DKLS-27-16		0.2741	0.0055	0.03906	0.00046	0.05151	0.00084		247	2.8
DKLS-27-17		0.2843	0.007	0.03979	0.00071	0.0517	0.0013		251.6	4.4
DKLS-27-18		0.276	0.01	0.03961	0.00086	0.0513	0.0021		250.4	5.3
DKLS-27-19		0.2753	0.0055	0.03898	0.00041	0.05147	0.00088		246.5	2.6
DKLS-27-20		0.2817	0.0064	0.03943	0.00048	0.0517	0.0011		249.3	3
DKLS-27-21		0.279	0.015	0.03949	0.00092	0.0522	0.0029		249.6	5.7
DKLS-27-22		0.2823	0.0097	0.03943	0.00093	0.0515	0.0013		249.3	5.8
DKLS-27-23		0.283	0.011	0.03943	0.0004	0.0518	0.0019		249.3	2.5
DKLS-27-24		0.2833	0.0062	0.03977	0.00063	0.05179	0.00084		251.4	3.9
DKLS-27-25		0.2763	0.0052	0.03954	0.00051	0.0511	0.00092		250	3.1
DKLS-27-26		0.277	0.012	0.03949	0.00076	0.0521	0.0021		249.7	4.7
DKLS-27-27		0.2801	0.0072	0.03957	0.00079	0.05104	0.00086		250.1	4.9
DKLS-27-28		0.2827	0.0075	0.03968	0.00088	0.05199	0.00093		250.8	5.4
DKLS-27-29		0.2733	0.0057	0.03952	0.00048	0.05148	0.00095		249.8	3
DKLS-27-30		0.281	0.014	0.03929	0.00042	0.0518	0.0024		248.4	2.6
DKLS-27-31		0.2716	0.0061	0.03951	0.00073	0.0508	0.00091		249.7	4.5
DKLS-27-32		0.2786	0.0063	0.03958	0.00045	0.0515	0.001		250.2	2.8
DKLS-27-33		0.2787	0.0064	0.03963	0.00054	0.0515	0.00086		250.5	3.3
DKLS-27-34		0.2789	0.0087	0.03934	0.00046	0.0508	0.0015		248.7	2.8
DKLS-27-35		0.2832	0.0057	0.03963	0.00051	0.0524	0.001		250.5	3.1
DKLS-27-36		0.2821	0.0074	0.03977	0.00048	0.0518	0.0012		251.4	3
DKLS-27-37		0.276	0.0053	0.03942	0.00044	0.05168	0.00092		249.2	2.7
DKLS-27-38		0.281	0.011	0.03944	0.00085	0.0531	0.0021		249.4	5.3
DKLS-27-39		0.2808	0.0072	0.03947	0.00072	0.05145	0.00086		249.5	4.5
DKLS-27-40		0.2796	0.0064	0.03927	0.00058	0.0534	0.0012		248.3	3.6
DKLS-27-41		0.2795	0.0061	0.03974	0.00043	0.0512	0.001		251.2	2.7
DKLS-27-42		0.2792	0.0085	0.03975	0.00059	0.0504	0.0014		251.3	3.6
DKLS-27-43		0.282	0.014	0.03958	0.00052	0.0506	0.0021		250.2	3.2
DKLS-27-44		0.2848	0.0061	0.03963	0.00063	0.05192	0.0009		250.5	3.9
DKLS-27-45		0.2842	0.0064	0.03972	0.00068	0.0517	0.0012		251.1	4.2
NP-2-1		0.662	0.035	0.0613	0.0017	0.0791	0.0039		383	10
NP-2-2		0.982	0.048	0.063	0.0016	0.1137	0.0051		393.4	9.7
NP-2-3		0.495	0.019	0.0591	0.0011	0.0612	0.0021		369.8	6.4
NP-2-4		0.491	0.016	0.0628	0.0012	0.0571	0.0014		392.6	7
NP-2-5		0.526	0.019	0.0642	0.0012	0.0596	0.0017		401.1	7.5
NP-2-6		0.808	0.05	0.0631	0.0014	0.0953	0.0062		394	8.4
NP-2-7		0.486	0.013	0.0628	0.0011	0.0569	0.0012		392.4	6.6
NP-2-8		0.502	0.017	0.0637	0.0013	0.0579	0.0016		398.1	8.2
NP-2-9		0.498	0.012	0.06298	0.00086	0.0578	0.0013		393.6	5.2
NP-2-10		0.483	0.013	0.0646	0.0012	0.055	0.0013		403.4	7.5
NP-2-11		0.48	0.011	0.06098	0.00083	0.0579	0.0014		381.5	5
LA-Q-ICP-MS @ 33 μm, 3 J·cm-2, 5 Hz 2023/06/11
DKLS-27-1		0.268	0.013	0.03851	0.00084	0.0495	0.0021		243.6	5.2
DKLS-27-2		0.2759	0.0061	0.03968	0.00054	0.0496	0.0011		250.9	3.3
DKLS-27-3		0.276	0.011	0.03983	0.00093	0.0504	0.0017		251.8	5.8
DKLS-27-4		0.286	0.013	0.0394	0.00095	0.051	0.0022		249.1	5.9
DKLS-27-5		0.2947	0.0094	0.0397	0.001	0.0542	0.0016		251.2	6.3
DKLS-27-6		0.28	0.011	0.0398	0.00089	0.05	0.002		251.6	5.5
DKLS-27-7		0.265	0.014	0.0395	0.0011	0.0503	0.002		249.8	6.9
DKLS-27-8		0.276	0.012	0.0394	0.0011	0.0503	0.0019		248.8	7.1
DKLS-27-9		0.281	0.01	0.0392	0.001	0.0507	0.0015		247.9	6.2
DKLS-27-10		0.2741	0.0066	0.03931	0.00059	0.05	0.0011		248.5	3.6
DKLS-27-11		0.2785	0.0092	0.03926	0.00087	0.0516	0.0013		248.2	5.4
DKLS-27-12		0.289	0.013	0.03981	0.00081	0.052	0.0023		251.6	5
DKLS-27-13		0.2873	0.0079	0.03925	0.00068	0.0522	0.0012		248.2	4.2
DKLS-27-14		0.2779	0.0056	0.03964	0.00065	0.051	0.001		250.6	4
DKLS-27-15		0.2788	0.0099	0.0397	0.0011	0.0525	0.0017		250.9	6.8
DKLS-27-16		0.2792	0.0062	0.03974	0.00059	0.0508	0.001		251.2	3.6
NP-2-1		0.635	0.022	0.0643	0.0013	0.0713	0.0021		401.6	7.8
NP-2-2		0.597	0.021	0.0638	0.0011	0.0676	0.0021		398.6	6.6
NP-2-3		0.483	0.013	0.061	0.001	0.0578	0.0013		381.4	6.2
NP-2-4		0.508	0.015	0.0634	0.0011	0.0579	0.0013		396.1	6.8
NP-2-5		0.526	0.019	0.0642	0.0012	0.0596	0.0017		401.1	7.5
NP-2-6		0.511	0.015	0.0627	0.0011	0.0594	0.0016		392	6.7
NP-2-7		0.969	0.039	0.0619	0.0014	0.1146	0.0043		387.1	8.4
NP-2-8		0.491	0.016	0.0628	0.0012	0.0571	0.0014		392.6	7
LA-Q-ICP-MS @ 33 μm, 3 J·cm-2, 5 Hz 2023/10/15
DKLS-27-1		0.2875	0.0079	0.03957	0.00058	0.0524	0.0014		250.1	3.6
DKLS-27-2		0.287	0.013	0.0402	0.0012	0.0512	0.0021		253.9	7.7
DKLS-27-3		0.2818	0.0063	0.03976	0.00055	0.0515	0.0011		251.3	3.4
DKLS-27-4		0.2821	0.0061	0.03972	0.0005	0.0514	0.001		251.1	3.1
DKLS-27-5		0.281	0.0088	0.0398	0.00096	0.0516	0.0015		251.6	6
DKLS-27-6		0.409	0.016	0.03967	0.00055	0.0738	0.0032		250.8	3.4
DKLS-27-7		0.285	0.011	0.03981	0.00073	0.052	0.0019		251.6	4.5
DKLS-27-8		0.291	0.011	0.04	0.0011	0.0517	0.0015		253	6.5
DKLS-27-9		0.284	0.011	0.0396	0.001	0.0516	0.002		250.4	6.4
DKLS-27-10		0.2843	0.0057	0.03968	0.00053	0.05158	0.00085		250.8	3.3
DKLS-27-11		0.2885	0.0082	0.03969	0.00077	0.0519	0.0012		250.9	4.8
DKLS-27-12		0.354	0.026	0.0405	0.001	0.0622	0.004		255.8	6.3
DKLS-27-13		0.2821	0.0073	0.03964	0.00081	0.0506	0.0015		250.6	5.1
DKLS-27-14		0.2824	0.0042	0.03935	0.00046	0.05185	0.00075		248.8	2.9
DKLS-27-15		0.29	0.01	0.03971	0.00078	0.0522	0.0018		251	4.8
DKLS-27-16		0.2787	0.007	0.03952	0.00052	0.0508	0.0011		249.8	3.2
DKLS-27-17		0.278	0.011	0.0398	0.0011	0.0508	0.0017		251.4	6.8
DKLS-27-18		0.2829	0.0082	0.03962	0.00096	0.0514	0.0014		250.5	6
DKLS-27-19		0.295	0.019	0.04	0.001	0.0528	0.0033		253	6.4
DKLS-27-20		0.2765	0.0085	0.03974	0.00087	0.0507	0.001		251.2	5.4
DKLS-27-21		0.274	0.014	0.03979	0.00096	0.05	0.002		251.5	5.9
DKLS-27-22		0.2802	0.007	0.03947	0.00073	0.0517	0.0013		249.5	4.5
DKLS-27-23		0.2777	0.0052	0.03952	0.00048	0.05073	0.00087		249.8	3
DKLS-27-24		0.2929	0.0076	0.03999	0.0006	0.05125	0.00094		252.8	3.7
DKLS-27-25		0.2778	0.008	0.03956	0.00074	0.0515	0.0012		250.1	4.6
DKLS-27-26		0.298	0.013	0.04026	0.00092	0.054	0.0026		254.4	5.7
DKLS-27-27		0.278	0.012	0.0396	0.0011	0.0515	0.0019		250.6	7.1
DKLS-27-28		0.2835	0.0057	0.03927	0.0004	0.05211	0.00089		248.3	2.5
DKLS-27-29		0.2806	0.0051	0.03975	0.00041	0.05145	0.00071		251.3	2.5
DKLS-27-30		0.2906	0.0067	0.03985	0.0006	0.05168	0.00091		251.9	3.7
DKLS-27-31		0.2802	0.007	0.03955	0.0006	0.05083	0.00096		250	3.7
DKLS-27-32		0.281	0.0042	0.03924	0.00048	0.05171	0.00065		248.1	3
DKLS-27-33		0.393	0.021	0.0399	0.001	0.0698	0.0038		252	6.4
DKLS-27-34		0.2702	0.0086	0.03953	0.00073	0.0499	0.0013		249.9	4.5
DKLS-27-35		0.29	0.011	0.03958	0.0009	0.0519	0.0012		250.2	5.6
DKLS-27-36		0.287	0.0063	0.03963	0.00062	0.0527	0.00099		250.5	3.9
NP-2-1		0.437	0.019	0.0606	0.0019	0.0531	0.0018		379	11
NP-2-2		0.447	0.017	0.0596	0.0014	0.0547	0.0019		373	8.7
NP-2-3		0.509	0.024	0.0636	0.0017	0.0574	0.0024		397	10
NP-2-4		0.572	0.024	0.0641	0.0017	0.0623	0.0026		400	10
NP-2-5		0.484	0.014	0.0618	0.0012	0.0562	0.0015		386.3	7.5
NP-2-6		0.506	0.014	0.0617	0.0012	0.0595	0.0015		385.8	7.5
NP-2-7		0.485	0.018	0.0621	0.0012	0.0562	0.002		388.2	7.1
NP-2-8		0.55	0.026	0.0604	0.0016	0.0655	0.0028		378.1	9.5
NP-2-9		0.514	0.024	0.0625	0.0016	0.0585	0.0024		392.4	9
LA-MC-ICPMS @ 15 μm, 3 J·cm-2, 5 Hz 2022/07/23
DKLS-27-1		0.2797	0.0035	0.03962	0.00041	0.04976	0.00014		250.4	2.5
DKLS-27-2		0.2795	0.0055	0.0396	0.00075	0.04935	0.00017		250.3	4.6
DKLS-27-3		0.2803	0.0045	0.03966	0.00045	0.04909	0.00011		250.7	2.8
DKLS-27-4		0.2806	0.0041	0.03979	0.00047	0.04909	0.00012		251.5	2.9
DKLS-27-5		0.2801	0.0045	0.03961	0.00066	0.04876	0.00016		250.4	4.1
DKLS-27-6		0.2814	0.0028	0.03976	0.00042	0.049134	8.4e-05		251.3	2.6
DKLS-27-7		0.2802	0.0034	0.0397	0.00042	0.04884	0.00014		251	2.6
DKLS-27-8		0.2794	0.0074	0.03962	0.0009	0.04901	0.00019		250.5	5.6
DKLS-27-9		0.2755	0.004	0.03936	0.00085	0.05034	0.00016		248.8	5.3
DKLS-27-10		0.2858	0.006	0.04023	0.00087	0.04875	0.00024		254.2	5.4
DKLS-27-11		0.2787	0.0037	0.03956	0.0004	0.04897	8.2e-05		250.1	2.4
DKLS-27-12		0.28	0.0033	0.0396	0.00048	0.04905	0.00011		250.3	3
DKLS-27-13		0.2775	0.0064	0.03963	0.00096	0.04878	0.00047		250.6	5.9
DKLS-27-14		0.2787	0.0025	0.03956	0.00032	0.04949	0.00011		250.1	2
DKLS-27-15		0.2794	0.0023	0.03961	0.00034	0.04971	0.0001		250.4	2.1
DKLS-27-16		0.2779	0.0034	0.03953	0.0007	0.05065	0.00011		249.9	4.4
DKLS-27-17		0.2823	0.0023	0.03995	0.00038	0.049191	9.9e-05		252.5	2.4
DKLS-27-18		0.279	0.0024	0.0396	0.00042	0.049296	9.1e-05		250.3	2.6
DKLS-27-19		0.2794	0.0028	0.03958	0.00047	0.04934	0.00012		250.2	2.9
DKLS-27-20		0.2796	0.0023	0.03955	0.00034	0.049623	7.8e-05		250	2.1
DKLS-27-21		0.2804	0.0066	0.0397	0.0011	0.0504	0.00019		250.8	6.9
NP-2-1		0.574	0.033	0.0637	0.0017	15.6986	0.418958		398	10
NP-2-2		0.563	0.025	0.0638	0.0015	15.674	0.368511		398.4	9.2
NP-2-3		0.499	0.021	0.0631	0.0014	15.8479	0.351617		394.2	8.4
NP-2-4		0.475	0.017	0.0628	0.0013	15.9236	0.329628		392.4	8
NP-2-5		0.531	0.029	0.0615	0.002	16.2602	0.528786		385	12
NP-2-6		0.512	0.015	0.0648	0.0011	15.4321	0.261965		404.9	6.7
NP-2-7		0.486	0.013	0.0614	0.0013	16.2866	0.344831		384	7.6
NP-2-8		0.495	0.018	0.0612	0.0015	16.3399	0.400487		382.9	9.1
LA-MC-ICPMS @ 10 μm, 3 J·cm-2, 5 Hz 2022/07/22
DKLS-27-1		0.2806	0.0025	0.03963	0.00048	0.05127	0.00026		250.5	2.9
DKLS-27-2		0.2798	0.0031	0.03961	0.00033	0.05089	0.00018		250.4	2.1
DKLS-27-3		0.2802	0.0028	0.03957	0.00044	0.05067	0.0004		250.2	2.7
DKLS-27-4		0.2782	0.0025	0.03932	0.00033	0.05071	0.00021		248.6	2
DKLS-27-5		0.2811	0.0049	0.03971	0.00064	0.05113	0.0003		251	3.9
DKLS-27-6		0.28	0.0026	0.03966	0.00028	0.05096	0.00018		250.7	1.7
DKLS-27-7		0.2779	0.0039	0.03929	0.00042	0.05114	0.00037		248.4	2.6
DKLS-27-8		0.2803	0.0024	0.03963	0.0003	0.05094	0.00016		250.5	1.9
DKLS-27-9		0.2796	0.0029	0.03962	0.0004	0.05119	0.00016		250.5	2.5
DKLS-27-10		0.2787	0.0041	0.03962	0.00063	0.05005	0.00028		250.5	3.9
DKLS-27-11		0.2774	0.005	0.03942	0.00072	0.04989	0.00023		249.3	4.5
DKLS-27-12		0.2794	0.006	0.03956	0.00086	0.05032	0.00024		250.1	5.4
DKLS-27-13		0.2774	0.0033	0.03945	0.00045	0.05038	0.00026		249.4	2.8
DKLS-27-14		0.2793	0.0034	0.03961	0.00057	0.05058	0.00015		250.4	3.5
DKLS-27-15		0.2795	0.0034	0.03958	0.00052	0.05079	0.00014		250.2	3.2
DKLS-27-16		0.2801	0.0043	0.03963	0.00071	0.05119	0.00016		250.5	4.4
DKLS-27-17		0.2794	0.0048	0.03966	0.00076	0.05084	0.00013		250.7	4.7
DKLS-27-18		0.2803	0.0041	0.03964	0.00068	0.05084	0.00014		250.6	4.2
DKLS-27-19		0.2788	0.0044	0.03954	0.0007	0.05096	0.00016		250	4.3
DKLS-27-20		0.2792	0.0043	0.03955	0.00071	0.05101	0.00013		250	4.4
DKLS-27-21		0.2788	0.0044	0.03956	0.00063	0.05091	0.00019		250.1	3.9
DKLS-27-22		0.2804	0.0056	0.03966	0.00087	0.0511	0.00018		250.7	5.4
DKLS-27-23		0.2797	0.0049	0.03958	0.00078	0.05118	0.00014		250.2	4.8
NP-2-1		0.697	0.029	0.0621	0.0011	0.082	0.0033		388.2	6.8
NP-2-2		0.651	0.022	0.05947	0.00085	0.0808	0.003		372.3	5.2
NP-2-3		0.673	0.022	0.0646	0.0011	0.0758	0.0026		403.5	6.8
NP-2-4		0.635	0.022	0.0643	0.0013	0.0713	0.0021		401.6	7.8
NP-2-5		0.597	0.021	0.0638	0.0011	0.0676	0.0021		398.6	6.6
NP-2-6		0.499	0.018	0.06507	0.00094	0.056	0.002		406.3	5.7
NP-2-7		0.49	0.019	0.0644	0.0013	0.0555	0.002		401.9	7.8
NP-2-8		0.534	0.023	0.0654	0.0013	0.0599	0.0026		408.4	7.9
LA-Q-ICPMS @ 33 μm, 3 J·cm-2, 5 Hz
JEQ-11-1		0.286	0.015	0.0384	0.00072	0.0547	0.0031		242.9	4.5
JEQ-11-2		0.28	0.015	0.03845	0.00072	0.0528	0.0026		243.2	4.5
JEQ-11-3		0.292	0.019	0.03898	0.0008	0.0547	0.0034		246.4	5
JEQ-11-4		0.267	0.014	0.03744	0.00073	0.0517	0.0026		236.9	4.5
JEQ-11-5		0.29	0.018	0.03871	0.00087	0.0558	0.0038		244.8	5.4
JEQ-11-6		0.288	0.013	0.03815	0.00064	0.0554	0.0027		241.3	4
JEQ-11-7		0.282	0.017	0.03836	0.00084	0.0535	0.0031		242.6	5.2
JEQ-11-8		0.295	0.015	0.03903	0.00078	0.055	0.0027		246.7	4.8
JEQ-11-9		0.279	0.018	0.03873	0.00088	0.053	0.0035		244.9	5.5
JEQ-11-10		0.268	0.013	0.0386	0.0011	0.0508	0.0027		244.2	6.8
JEQ-11-11		0.288	0.014	0.03875	0.00075	0.0541	0.0027		245	4.6
JEQ-11-12		0.282	0.015	0.0385	0.00082	0.0539	0.0031		243.5	5.1
JEQ-11-13		0.285	0.013	0.03911	0.00081	0.0535	0.0024		247.3	5
JEQ-11-14		0.282	0.015	0.03873	0.0009	0.0532	0.0029		244.9	5.6
JEQ-11-15		0.291	0.012	0.03945	0.00075	0.0531	0.0023		249.3	4.7
JEQ-11-16		0.281	0.013	0.03978	0.00077	0.0513	0.0025		251.4	4.8
JEQ-11-17		0.29	0.011	0.03954	0.00076	0.0532	0.0022		249.9	4.7
JEQ-11-18		0.293	0.013	0.0391	0.00078	0.0549	0.0026		247.2	4.9
JEQ-11-19		0.298	0.013	0.03996	0.00063	0.0549	0.0026		252.6	3.9
JEQ-11-20		0.289	0.016	0.03916	0.0009	0.0535	0.0027		248.4	5.8
JEQ-11-21		0.282	0.018	0.04051	0.00079	0.0513	0.0033		255.9	4.9
JEQ-11-22		0.278	0.014	0.03959	0.00085	0.0512	0.0028		250.2	5.3
JEQ-11-23		0.286	0.014	0.03967	0.00086	0.0522	0.0027		250.7	5.3
JEQ-11-24		0.297	0.014	0.03936	0.0009	0.0544	0.0022		248.8	5.6
JEQ-11-25		0.295	0.013	0.03889	0.00075	0.0544	0.0023		245.9	4.6
JEQ-11-26		0.275	0.013	0.03917	0.00076	0.051	0.0024		247.6	4.7
JEQ-11-27		0.28	0.013	0.03921	0.00076	0.0519	0.0025		247.9	4.7
JEQ-11-28		0.277	0.011	0.03911	0.00088	0.0508	0.0019		247.3	5.4
JEQ-11-29		0.283	0.013	0.03936	0.00078	0.0525	0.0024		248.8	4.9
JEQ-11-30		0.283	0.016	0.03905	0.00071	0.0531	0.0028		246.9	4.4
JEQ-11-31		0.281	0.013	0.03927	0.0008	0.0526	0.0025		248.3	5
JEQ-11-32		0.301	0.021	0.03925	0.00091	0.0559	0.0038		248.1	5.7
JEQ-11-33		0.282	0.014	0.03934	0.00086	0.0526	0.0026		248.7	5.3
JEQ-11-34		0.299	0.016	0.03961	0.00096	0.0547	0.0028		250.3	5.9
JEQ-11-35		0.29	0.013	0.03919	0.00083	0.0533	0.0025		247.8	5.1
JEQ-11-36		0.284	0.011	0.03944	0.00084	0.0517	0.0019		249.3	5.2
JEQ-11-37		0.29	0.014	0.03945	0.00093	0.0536	0.0023		249.3	5.7
JEQ-11-38		0.291	0.015	0.03944	0.00079	0.0532	0.0026		249.3	4.9
NP-2-1		0.486	0.013	0.0628	0.0011	0.0569	0.0012		392.4	6.6
NP-2-2		0.502	0.017	0.0637	0.0013	0.0579	0.0016		398.1	8.2
NP-2-3		0.498	0.012	0.06298	0.00086	0.0578	0.0013		393.6	5.2
NP-2-4		0.483	0.013	0.0646	0.0012	0.055	0.0013		403.4	7.5
NP-2-5		0.48	0.011	0.06098	0.00083	0.0579	0.0014		381.5	5
NP-2-6		0.697	0.029	0.0621	0.0011	0.082	0.0033		388.2	6.8
NP-2-7		0.651	0.022	0.05947	0.00085	0.0808	0.003		372.3	5.2
NP-2-8		0.715	0.045	0.0611	0.0014	0.0843	0.0039		382.2	8.4
NP-2-9		0.508	0.019	0.0608	0.0011	0.0612	0.0019		380.4	6.7
LA-MC-ICPMS @ 15 μm, 3 J·cm-2, 5 Hz
JEQ-11-1		0.2747	0.0067	0.03946	0.00057	0.05033	0.00073		249.5	3.6
JEQ-11-2		0.2795	0.0045	0.03955	0.00069	0.05115	0.00069		250.1	4.3
JEQ-11-3		0.2751	0.0051	0.0395	0.0007	0.05048	0.00051		249.7	4.3
JEQ-11-4		0.2768	0.0036	0.03958	0.00036	0.05096	0.00066		250.2	2.3
JEQ-11-5		0.2698	0.0046	0.03982	0.00035	0.04949	0.00068		251.7	2.2
JEQ-11-6		0.2794	0.004	0.0395	0.0005	0.05138	0.00043		249.7	3.1
JEQ-11-7		0.2783	0.005	0.03926	0.0006	0.0515	0.001		248.3	3.7
JEQ-11-8		0.2765	0.0033	0.03952	0.00035	0.0512	0.00043		249.8	2.2
JEQ-11-9		0.2725	0.0035	0.03939	0.00038	0.05109	0.00042		249	2.3
JEQ-11-10		0.2716	0.0035	0.03925	0.00046	0.05105	0.00048		248.2	2.9
JEQ-11-11		0.2768	0.0034	0.03931	0.00051	0.0519	0.00075		248.5	3.2
JEQ-11-12		0.2709	0.0028	0.03932	0.00031	0.05103	0.00048		248.6	1.9
JEQ-11-13		0.2763	0.0045	0.03946	0.00045	0.05179	0.00072		249.5	2.8
JEQ-11-14		0.2789	0.0055	0.03941	0.00069	0.05228	0.0006		249.2	4.3
JEQ-11-15		0.2724	0.0043	0.03907	0.00046	0.05159	0.0005		247	2.9
JEQ-11-16		0.2754	0.0043	0.03912	0.00044	0.05209	0.00076		247.4	2.7
JEQ-11-17		0.2809	0.0033	0.03946	0.00051	0.05155	0.00031		249.5	3.1
JEQ-11-18		0.2844	0.0051	0.03955	0.00068	0.05204	0.00052		250.1	4.2
JEQ-11-19		0.2812	0.0027	0.0394	0.00025	0.05162	0.00041		249.1	1.6
JEQ-11-20		0.2858	0.0039	0.03946	0.00042	0.05228	0.00039		249.5	2.6
JEQ-11-21		0.2823	0.0033	0.03946	0.00025	0.05183	0.00046		249.5	1.6
JEQ-11-22		0.2815	0.0062	0.03929	0.00033	0.05204	0.00094		248.4	2
JEQ-11-23		0.285	0.0039	0.03948	0.0004	0.05232	0.00035		249.6	2.5
JEQ-11-24		0.2776	0.0074	0.03879	0.00038	0.052	0.0014		245.3	2.4
NP-2-1		0.53	0.021	0.0614	0.0016	16.2866	0.424408		384.1	9.9
NP-2-2		0.505	0.02	0.0618	0.0014	16.1812	0.366565		386.3	8.8
NP-2-3		0.51	0.021	0.0632	0.0016	15.8228	0.400577		395.1	9.7
NP-2-4		0.527	0.027	0.0627	0.0024	15.949	0.610487		392	15
NP-2-5		0.51	0.023	0.0643	0.0013	15.5521	0.314428		401.5	8.1
NP-2-6		0.493	0.018	0.0619	0.0013	16.1551	0.339283		387.2	8.1
NP-2-7		0.502	0.021	0.0632	0.0013	15.8228	0.325469		395.1	7.8
NP-2-8		0.477	0.019	0.0648	0.0014	15.4321	0.33341		404.5	8.7
NP-2-9		0.452	0.018	0.0596	0.0016	16.7785	0.45043		373.4	9.9
LA-MC-ICPMS @ 10 μm, 3 J·cm-2, 5 Hz
JEQ-11-1		0.284	0.015	0.0396	0.0016	0.05168	0.00056		250	10
JEQ-11-2		0.289	0.012	0.0396	0.001	0.05202	0.00051		250.2	6.4
JEQ-11-3		0.29	0.011	0.03982	0.0009	0.05185	0.00052		251.7	5.6
JEQ-11-4		0.2909	0.0082	0.0392	0.00045	0.05236	0.00056		247.9	2.8
JEQ-11-5		0.282	0.012	0.0392	0.0012	0.05178	0.00047		247.9	7.5
JEQ-11-6		0.289	0.01	0.03949	0.00084	0.05197	0.0006		249.7	5.2
JEQ-11-7		0.29	0.01	0.03954	0.00089	0.05215	0.00051		250	5.5
JEQ-11-8		0.292	0.011	0.04	0.0011	0.05261	0.00052		252.6	7
JEQ-11-9		0.28	0.013	0.039	0.0014	0.05182	0.00058		246.4	8.4
JEQ-11-10		0.279	0.013	0.0393	0.0014	0.052	0.00051		248.6	8.9
JEQ-11-11		0.288	0.011	0.03982	0.00097	0.05189	0.00055		251.7	6
JEQ-11-12		0.284	0.014	0.0394	0.0015	0.05222	0.00048		248.7	9.1
JEQ-11-13		0.276	0.013	0.0385	0.0015	0.05287	0.00082		243.6	9.2
JEQ-11-14		0.289	0.012	0.0396	0.0012	0.05279	0.00046		250	7.2
JEQ-11-15		0.29	0.014	0.0393	0.0013	0.05266	0.00042		248.5	8.3
JEQ-11-16		0.2818	0.0077	0.03895	0.00059	0.05185	0.00053		246.3	3.7
JEQ-11-17		0.274	0.015	0.039	0.0018	0.0514	0.0005		247	11
JEQ-11-18		0.2764	0.0078	0.0399	0.00078	0.05197	0.00066		252.2	4.8
JEQ-11-19		0.284	0.013	0.0398	0.0014	0.05218	0.0007		251.8	8.9
JEQ-11-20		0.276	0.011	0.0393	0.0012	0.05221	0.00056		248.7	7.2
JEQ-11-21		0.286	0.015	0.0401	0.0017	0.05217	0.00057		254	11
JEQ-11-22		0.285	0.012	0.0398	0.0012	0.05224	0.00045		251.3	7.5
JEQ-11-23		0.271	0.0092	0.0393	0.001	0.05211	0.00062		248.2	6.3
JEQ-11-24		0.279	0.01	0.0397	0.0011	0.05275	0.00067		250.7	7
NP-2-1		0.453	0.019	0.0636	0.0012	0.0517	0.002		397.6	7
NP-2-2		0.504	0.021	0.06351	0.00093	0.0573	0.0024		396.9	5.7
NP-2-3		0.505	0.022	0.0628	0.00093	0.0581	0.0024		392.6	5.6
NP-2-4		0.507	0.022	0.0644	0.0013	0.0576	0.0025		402.2	8
NP-2-5		0.512	0.021	0.0637	0.0011	0.0581	0.0022		397.8	7
NP-2-6		0.481	0.024	0.0626	0.0016	0.0554	0.0026		391.4	9.4
NP-2-7		0.558	0.021	0.0648	0.0013	0.0622	0.0023		404.5	7.7
NP-2-8		0.477	0.022	0.0626	0.0011	0.0554	0.0025		391.4	6.9

## Sheet: Table S5
Table S5 U-Pb data for sample JEQ-2 corrected by Coltan139
Comments		Ratios							Age （Ma）
		207Pb/235U	2SE	206Pb/238U	2SE	207Pb/206Pb	2SE		206Pb/238U Age	2SE
LA-MC-ICPMS @ 10 μm, 3 J·cm-2, 5 Hz
Session 1 Ta# = 0.1 ~ 0.4
JEQ-2-1		0.2847	0.0053	0.03965	0.00065	0.05186	0.00021		250.7	4
JEQ-2-2		0.2865	0.0095	0.0401	0.0012	0.05153	0.00022		253.6	7.2
JEQ-2-3		0.2872	0.0066	0.03995	0.00086	0.05189	0.00035		252.5	5.4
JEQ-2-4		0.278	0.012	0.0387	0.0016	0.05227	0.00059		244.8	9.6
JEQ-2-5		0.275	0.012	0.0389	0.0017	0.05127	0.00066		246	10
JEQ-2-6		0.2814	0.008	0.0402	0.001	0.05097	0.00049		254	6.5
JEQ-2-7		0.2779	0.0087	0.03987	0.00085	0.0507	0.0011		252	5.3
JEQ-2-8		0.2767	0.0093	0.04034	0.0008	0.0503	0.0016		254.9	5
JEQ-2-9		0.2828	0.0066	0.0398	0.00099	0.05206	0.00087		251.6	6.1
JEQ-2-10		0.2903	0.0058	0.04021	0.00074	0.05262	0.00065		254.1	4.6
JEQ-2-11		0.2966	0.0092	0.0418	0.0013	0.05169	0.00036		264.2	7.8
JEQ-2-12		0.2882	0.0096	0.0405	0.0012	0.052	0.00039		255.8	7.6
JEQ-2-13		0.284	0.0086	0.0398	0.0011	0.05209	0.00055		251.7	7
JEQ-2-14		0.2783	0.0082	0.0394	0.0011	0.05171	0.00054		248.8	6.7
JEQ-2-15		0.2844	0.0086	0.04007	0.00095	0.05191	0.00065		253.3	5.9
JEQ-2-16		0.2822	0.006	0.03957	0.00068	0.05205	0.00036		250.2	4.2
JEQ-2-17		0.2868	0.0076	0.04	0.0011	0.05238	0.00029		252.9	6.7
JEQ-2-18		0.2889	0.0078	0.0403	0.0011	0.05237	0.00024		254.8	6.6
JEQ-2-19		0.297	0.0039	0.04181	0.00039	0.0516	0.00033		264	2.4
JEQ-2-20		0.2956	0.0091	0.0406	0.0011	0.053	0.00046		256.6	6.7
JEQ-2-21		0.2924	0.0091	0.0407	0.0011	0.05243	0.00059		256.9	6.8
JEQ-2-22		0.286	0.012	0.0401	0.0015	0.05197	0.00031		253.3	9.5
JEQ-2-23		0.287	0.01	0.0401	0.0015	0.05207	0.00051		253.6	9.1
JEQ-2-24		0.283	0.011	0.0395	0.0015	0.05224	0.00067		250	9.6
JEQ-2-25		0.2829	0.0096	0.0393	0.0015	0.05309	0.00036		248.3	9.4
JEQ-2-26		0.288	0.012	0.04	0.0015	0.05237	0.00054		252.9	9
JEQ-2-27		0.284	0.012	0.0394	0.0015	0.05268	0.00063		248.8	9.6
Session 2 Ta# = 0.4 ~ 0.6
JEQ-2-1		0.305	0.0079	0.04273	0.00097	0.05177	0.00033		269.7	6
JEQ-2-2		0.3058	0.0076	0.0431	0.0011	0.05161	0.00039		271.7	6.5
JEQ-2-3		0.3069	0.0052	0.0442	0.00059	0.0498	0.00049		278.8	3.7
JEQ-2-4		0.302	0.01	0.0435	0.0014	0.0507	0.00029		274.2	8.7
JEQ-2-5		0.309	0.01	0.0435	0.0013	0.05176	0.00056		274.3	8.1
JEQ-2-6		0.305	0.0057	0.04295	0.00072	0.05166	0.00039		271.1	4.5
JEQ-2-7		0.3044	0.0036	0.04287	0.00037	0.05162	0.00045		270.6	2.3
JEQ-2-8		0.3113	0.0092	0.0431	0.0012	0.05246	0.00058		272.2	7.2
JEQ-2-9		0.31	0.012	0.0434	0.0013	0.05215	0.00079		273.8	8.1
JEQ-2-10		0.3064	0.0067	0.04266	0.00085	0.05243	0.00055		269.3	5.3
JEQ-2-11		0.3158	0.0077	0.04405	0.00087	0.05227	0.00065		277.9	5.4
JEQ-2-12		0.314	0.01	0.04316	0.00099	0.0525	0.00075		272.3	6.1
JEQ-2-13		0.31	0.011	0.043	0.0015	0.05249	0.00061		271.3	9.4
JEQ-2-14		0.3066	0.0056	0.04283	0.00076	0.05211	0.00034		270.3	4.7
JEQ-2-15		0.3078	0.0074	0.0432	0.001	0.05188	0.00036		272.9	6.2
JEQ-2-16		0.314	0.017	0.0432	0.0022	0.05288	0.00047		273	14
JEQ-2-17		0.312	0.011	0.0437	0.0013	0.05206	0.00054		275.8	8.2
JEQ-2-18		0.304	0.011	0.0429	0.0014	0.0519	0.0016		270.9	8.7
JEQ-2-19		0.3092	0.0081	0.04281	0.00096	0.05247	0.00082		270.2	5.9
JEQ-2-20		0.32	0.012	0.0437	0.0013	0.0532	0.0011		275.7	7.8
JEQ-2-21		0.313	0.014	0.0426	0.0015	0.0536	0.0014		268.7	9.2
JEQ-2-22		0.3049	0.0099	0.0424	0.0013	0.05229	0.00043		267.9	8.2
JEQ-2-23		0.307	0.011	0.0428	0.0015	0.05225	0.00046		270.2	9.2
Session 3 Ta# = 0.6 ~ 0.9
JEQ-2-1		0.3271	0.0079	0.0456	0.0011	0.05187	0.00044		287.2	6.5
JEQ-2-2		0.3335	0.0094	0.046	0.0012	0.05252	0.00042		289.7	7.3
JEQ-2-3		0.3316	0.006	0.04605	0.00083	0.05187	0.00024		290.2	5.1
JEQ-2-4		0.372	0.006	0.0444	0.0003	0.0602	0.00069		280	1.8
JEQ-2-5		0.3284	0.0094	0.0461	0.0012	0.05188	0.00044		290.4	7.1
JEQ-2-6		0.329	0.017	0.0454	0.0021	0.05276	0.00031		286	13
JEQ-2-7		0.322	0.011	0.0458	0.0015	0.05115	0.00018		288.6	9.3
JEQ-2-8		0.3156	0.0025	0.04501	0.0004	0.05054	0.00033		283.8	2.4
JEQ-2-9		0.3244	0.007	0.046	0.0011	0.05118	0.00021		289.9	6.5
JEQ-2-10		0.3344	0.0064	0.04708	0.00069	0.05077	0.0008		296.6	4.3
JEQ-2-11		0.319	0.01	0.0456	0.0012	0.05101	0.00065		287.1	7.2
JEQ-2-12		0.3281	0.0091	0.0464	0.0011	0.05159	0.00064		292.1	6.9
JEQ-2-13		0.3242	0.0099	0.0458	0.0013	0.05156	0.00052		288.7	8
JEQ-2-14		0.33	0.011	0.0464	0.0015	0.0516	0.00039		292.5	9
JEQ-2-15		0.3316	0.0072	0.04601	0.00085	0.05211	0.00036		289.9	5.3
JEQ-2-16		0.3213	0.0093	0.0449	0.0013	0.0521	0.00043		282.8	7.8
JEQ-2-17		0.3255	0.0087	0.0455	0.0012	0.05193	0.0004		286.9	7.4
JEQ-2-18		0.327	0.013	0.0459	0.0018	0.05208	0.00038		289	11
JEQ-2-19		0.404	0.022	0.0492	0.0031	0.06043	0.0009		310	19
JEQ-2-20		0.415	0.014	0.04605	0.00093	0.0656	0.0014		290.2	5.7
JEQ-2-21		0.3267	0.0063	0.04586	0.00075	0.05175	0.00035		289	4.6
JEQ-2-22		0.3668	0.004	0.05066	0.0007	0.05245	0.00078		318.6	4.3
JEQ-2-23		0.33	0.0056	0.0461	0.0008	0.05197	0.00021		290.5	4.9
JEQ-2-24		0.3299	0.0075	0.04517	0.00088	0.0531	0.00023		284.8	5.4
JEQ-2-25		0.396	0.046	0.0454	0.0028	0.0629	0.0036		286	17
JEQ-2-26		0.327	0.006	0.04573	0.00071	0.05176	0.00035		288.2	4.4
JEQ-2-27		0.331	0.01	0.0461	0.0011	0.05274	0.00069		290.8	6.8
JEQ-2-28		0.334	0.012	0.0465	0.0016	0.05221	0.00042		292.7	9.8
JEQ-2-29		0.3282	0.0067	0.0466	0.0008	0.05135	0.00024		293.6	4.9
JEQ-2-30		0.331	0.011	0.0461	0.0013	0.05207	0.00041		290.6	8.3
JEQ-2-31		0.327	0.01	0.046	0.0014	0.05173	0.00033		290	8.6
JEQ-2-32		0.3229	0.0095	0.0457	0.0012	0.05139	0.00021		287.8	7.5
JEQ-2-33		0.352	0.014	0.0459	0.0016	0.05587	0.0009		289.3	9.8
JEQ-2-34		0.345	0.011	0.0459	0.0012	0.05453	0.00063		289.3	7.5
JEQ-2-35		0.3288	0.0053	0.04579	0.00068	0.05191	0.00026		288.6	4.2
JEQ-2-36		0.3287	0.0074	0.046	0.0011	0.05208	0.00035		289.9	7
JEQ-2-37		0.329	0.01	0.0462	0.0014	0.05164	0.00031		290.9	8.5
JEQ-2-38		0.331	0.012	0.0465	0.0016	0.05166	0.00034		292.7	9.6
JEQ-2-39		0.333	0.011	0.0467	0.0015	0.05179	0.00025		294.2	9.2
JEQ-2-40		0.3254	0.0075	0.0461	0.001	0.05131	0.0005		290.3	6.2
JEQ-2-41		0.33	0.0092	0.0457	0.0011	0.05243	0.00069		287.9	6.8
JEQ-2-42		0.3295	0.0091	0.0459	0.0011	0.05199	0.00056		289.2	6.7
JEQ-2-43		0.333	0.011	0.0465	0.0015	0.05206	0.00043		292.7	8.9
DKLS-27-1		0.281	0.016	0.0397	0.0012	0.0512	0.0028		250.8	7.6
DKLS-27-2		0.269	0.025	0.0396	0.0016	0.0491	0.0048		250.2	9.8
DKLS-27-3		0.33	0.023	0.0396	0.00095	0.061	0.0043		250.3	5.9
DKLS-27-4		0.283	0.012	0.03973	0.00085	0.0519	0.0021		251.1	5.2
DKLS-27-5		0.27	0.01	0.03944	0.00081	0.0501	0.0021		249.3	5
DKLS-27-6		0.278	0.013	0.03958	0.0008	0.0517	0.0025		250.2	5
DKLS-27-7		0.275	0.011	0.03967	0.00067	0.0501	0.0019		250.8	4.2
DKLS-27-8		0.281	0.024	0.0394	0.0015	0.0512	0.0039		248.8	9.2
DKLS-27-9		0.28	0.015	0.0395	0.001	0.0508	0.003		249.7	6.4
DKLS-27-10		0.331	0.019	0.03978	0.00073	0.0602	0.0032		251.4	4.5
DKLS-27-11		0.282	0.013	0.03968	0.00079	0.052	0.0025		250.8	4.9
DKLS-27-12		0.307	0.02	0.0397	0.001	0.0554	0.0036		250.9	6.4
DKLS-27-13		0.276	0.012	0.03979	0.00076	0.0506	0.0023		251.5	4.7
DKLS-27-14		0.279	0.014	0.03961	0.00084	0.0508	0.0023		250.4	5.2
DKLS-27-15		0.286	0.012	0.0397	0.001	0.0526	0.0024		250.8	6.3
DKLS-27-16		0.283	0.012	0.03963	0.00081	0.0512	0.0019		250.5	5
DKLS-27-17		0.28	0.013	0.04042	0.00097	0.0496	0.0024		255.4	6
DKLS-27-18		0.272	0.018	0.04	0.0013	0.0487	0.0034		252.9	7.9
DKLS-27-19		0.276	0.014	0.0397	0.001	0.05	0.0027		250.8	6.5
DKLS-27-20		0.288	0.032	0.0398	0.002	0.0518	0.0049		252	13
DKLS-27-21		0.283	0.012	0.0397	0.0013	0.0522	0.0022		250.7	7.9
DKLS-27-22		0.285	0.018	0.0395	0.0012	0.0527	0.0032		249.9	7.5
DKLS-27-23		0.273	0.015	0.03957	0.00084	0.0507	0.0028		250.1	5.2
LA-SF-ICPMS @ 10 μm, 2 J·cm-2, 6 Hz
Session 1 Ta# = 0.1 ~ 0.4
JEQ-2-1		0.2728	0.009	0.03962	0.00088	0.0503	0.0016		250.4	5.5
JEQ-2-2		0.284	0.012	0.0401	0.0014	0.0513	0.002		253.4	8.5
JEQ-2-3		0.2832	0.0087	0.0399	0.0013	0.05145	0.00097		252	7.9
JEQ-2-4		0.287	0.006	0.04002	0.00071	0.052	0.0013		252.9	4.4
JEQ-2-5		0.291	0.013	0.0397	0.0016	0.0532	0.0025		250.7	9.8
JEQ-2-6		0.288	0.013	0.0398	0.0016	0.0522	0.0017		251.5	9.8
JEQ-2-7		0.267	0.019	0.0405	0.0014	0.049	0.0031		255.7	8.5
JEQ-2-8		0.278	0.014	0.0401	0.0013	0.0507	0.0019		253.7	8.3
JEQ-2-9		0.287	0.011	0.0399	0.0012	0.0524	0.0022		252.1	7.4
JEQ-2-10		0.277	0.011	0.03908	0.00088	0.0515	0.0019		247.1	5.5
JEQ-2-11		0.298	0.027	0.0409	0.0019	0.0523	0.0043		258	12
JEQ-2-12		0.269	0.025	0.0397	0.0013	0.0497	0.0045		251.1	8.4
JEQ-2-13		0.288	0.018	0.0407	0.0015	0.0514	0.0027		257.2	9.2
JEQ-2-14		0.279	0.015	0.0403	0.0011	0.051	0.0029		254.9	6.8
JEQ-2-15		0.283	0.014	0.0406	0.0011	0.0507	0.0026		256.8	7
JEQ-2-16		0.283	0.012	0.0412	0.001	0.0498	0.0019		260.3	6.5
JEQ-2-17		0.2884	0.0068	0.04044	0.00098	0.0518	0.0011		255.5	6.1
JEQ-2-18		0.2694	0.0091	0.0394	0.001	0.0501	0.0017		248.8	6.4
JEQ-2-19		0.285	0.011	0.04013	0.00092	0.0519	0.002		253.6	5.7
JEQ-2-20		0.306	0.022	0.0402	0.0013	0.0562	0.0041		253.8	7.9
JEQ-2-21		0.299	0.031	0.0403	0.0039	0.0555	0.0082		255	24
JEQ-2-22		0.288	0.016	0.0404	0.0015	0.0517	0.0023		255.3	9.5
JEQ-2-23		0.284	0.012	0.0398	0.0011	0.0522	0.0025		251.4	6.9
JEQ-2-24		0.295	0.014	0.041	0.001	0.0521	0.0025		259	6.3
JEQ-2-25		0.281	0.011	0.0399	0.0013	0.0515	0.0013		252.1	7.9
JEQ-2-26		0.2747	0.0076	0.03952	0.00075	0.0507	0.0014		249.8	4.7
JEQ-2-27		0.277	0.013	0.0402	0.0015	0.0503	0.0021		253.9	9.3
JEQ-2-28		0.277	0.011	0.04	0.00068	0.0503	0.0019		252.8	4.2
JEQ-2-29		0.295	0.013	0.0398	0.001	0.0537	0.0022		251.5	6.4
JEQ-2-30		0.282	0.023	0.0404	0.0011	0.0506	0.0036		255.4	6.8
JEQ-2-31		0.278	0.017	0.0407	0.001	0.0489	0.0027		257.1	6.2
JEQ-2-32		0.274	0.015	0.04	0.001	0.0494	0.0023		252.9	6.4
JEQ-2-33		0.272	0.027	0.0401	0.0014	0.0498	0.0053		253.5	8.9
JEQ-2-34		0.271	0.044	0.0401	0.0021	0.0493	0.0089		253	13
JEQ-2-35		0.29	0.041	0.0405	0.0026	0.0516	0.0063		256	16
JEQ-2-36		0.304	0.015	0.0399	0.0011	0.0552	0.0027		252.3	6.8
JEQ-2-37		0.309	0.024	0.0403	0.0013	0.0554	0.0039		254.8	8.2
JEQ-2-38		0.294	0.011	0.0406	0.00072	0.0525	0.0018		256.6	4.5
JEQ-2-39		0.29	0.017	0.0399	0.0012	0.0526	0.003		252	7.6
JEQ-2-40		0.289	0.025	0.0399	0.0012	0.0524	0.0049		252.4	7.2
JEQ-2-41		0.268	0.027	0.0404	0.0014	0.048	0.0047		255.2	8.8
JEQ-2-42		0.273	0.011	0.03911	0.00062	0.0505	0.0021		247.3	3.9
JEQ-2-43		0.307	0.02	0.0397	0.0011	0.0562	0.0039		251.1	7
JEQ-2-44		0.284	0.015	0.0398	0.0012	0.052	0.0024		251.8	7.2
JEQ-2-45		0.294	0.019	0.0403	0.0015	0.0529	0.0031		254.9	9.3
JEQ-2-46		0.2734	0.0099	0.0397	0.0011	0.0502	0.0017		250.7	6.9
JEQ-2-47		0.2883	0.009	0.03991	0.00097	0.0528	0.0014		252.2	6
JEQ-2-48		0.284	0.013	0.04083	0.00091	0.0508	0.0022		258	5.7
JEQ-2-49		0.287	0.018	0.0396	0.0015	0.0525	0.0034		250.1	9.6
Session 2 Ta# = 0.4 ~ 0.6
JEQ-2-1		0.288	0.015	0.0417	0.0014	0.0516	0.002		263.1	8.7
JEQ-2-2		0.304	0.027	0.0413	0.002	0.0544	0.0049		261	13
JEQ-2-3		0.3025	0.0073	0.04335	0.00076	0.0513	0.0013		273.6	4.7
JEQ-2-4		0.284	0.013	0.0412	0.0013	0.0502	0.0018		260.2	8
JEQ-2-5		0.311	0.017	0.0434	0.0012	0.0519	0.0024		273.9	7.6
JEQ-2-6		0.309	0.019	0.0437	0.0011	0.052	0.0037		275.7	6.8
JEQ-2-7		0.2928	0.0098	0.0421	0.001	0.0505	0.0016		265.7	6.5
JEQ-2-8		0.313	0.017	0.0414	0.0015	0.0548	0.0029		261.3	9.6
JEQ-2-9		0.303	0.02	0.0423	0.001	0.052	0.0037		267.4	6.2
JEQ-2-10		0.292	0.015	0.04186	0.00097	0.0507	0.0023		264.3	6
JEQ-2-11		0.318	0.013	0.0435	0.0014	0.0535	0.0022		274.3	8.5
JEQ-2-12		0.304	0.015	0.0438	0.0013	0.0506	0.0028		276.6	8
JEQ-2-13		0.293	0.01	0.0414	0.0016	0.0514	0.0019		261.6	9.7
JEQ-2-14		0.298	0.013	0.0428	0.0012	0.0512	0.0016		270.3	7.1
JEQ-2-15		0.322	0.023	0.0427	0.0015	0.0542	0.0024		269.8	9.2
JEQ-2-16		0.322	0.015	0.04223	0.00087	0.055	0.0026		266.6	5.4
Session 3 Ta# = 0.6 ~ 0.9
JEQ-2-1		0.325	0.013	0.0463	0.0013	0.0511	0.002		291.8	7.8
JEQ-2-2		0.33	0.012	0.04601	0.00097	0.052	0.0019		289.9	6
JEQ-2-3		0.327	0.0097	0.0457	0.0011	0.0516	0.0013		287.9	7
JEQ-2-4		0.3344	0.009	0.046	0.0011	0.05265	0.00094		289.6	6.6
JEQ-2-5		0.327	0.0094	0.0465	0.0011	0.0515	0.0015		293.2	6.7
JEQ-2-6		0.312	0.039	0.0475	0.0022	0.0491	0.0048		299	14
JEQ-2-7		0.319	0.017	0.045	0.0012	0.0514	0.0027		283.9	7.2
JEQ-2-8		0.316	0.021	0.0448	0.0017	0.0521	0.0041		282	11
JEQ-2-9		0.304	0.015	0.0444	0.0012	0.0503	0.0027		280.1	7.2
JEQ-2-10		0.363	0.02	0.0461	0.0022	0.059	0.0031		290	13
JEQ-2-11		0.362	0.022	0.0472	0.0014	0.057	0.0021		297.4	8.5
JEQ-2-12		0.3215	0.0085	0.046	0.0011	0.0512	0.0011		289.8	6.6
JEQ-2-13		0.317	0.015	0.0462	0.0015	0.0503	0.0018		291.2	9.4
JEQ-2-14		0.327	0.013	0.0462	0.0012	0.051	0.0017		291.3	7.6
JEQ-2-15		0.364	0.012	0.0463	0.0013	0.0569	0.0014		291.8	8
JEQ-2-16		0.384	0.011	0.04649	0.00096	0.0596	0.0017		292.9	5.9
JEQ-2-17		0.33	0.015	0.0463	0.0012	0.0521	0.002		291.4	7.5
JEQ-2-18		0.344	0.016	0.0466	0.0012	0.0539	0.0022		293.6	7.6
JEQ-2-19		0.351	0.018	0.0481	0.0013	0.0529	0.0024		302.5	8.1
JEQ-2-20		0.316	0.015	0.0458	0.0015	0.0496	0.002		288.6	9.1
JEQ-2-21		0.336	0.011	0.0467	0.0015	0.0519	0.0013		294	9.2
JEQ-2-22		0.326	0.014	0.0462	0.0012	0.0512	0.0021		291.4	7.4
JEQ-2-23		0.332	0.012	0.0462	0.0014	0.052	0.0013		291.2	8.4
JEQ-2-24		0.345	0.026	0.0466	0.0016	0.0542	0.0029		293.8	9.6
JEQ-2-25		0.364	0.021	0.0466	0.0014	0.057	0.0035		293.7	8.6
JEQ-2-26		0.335	0.015	0.0461	0.001	0.0522	0.0023		290.7	6.2
JEQ-2-27		0.337	0.016	0.0465	0.0013	0.0533	0.0021		293.1	8.3
JEQ-2-28		0.329	0.012	0.0466	0.0017	0.0516	0.0016		294	11
JEQ-2-29		0.32	0.025	0.046	0.003	0.0504	0.0026		289	18
JEQ-2-30		0.331	0.016	0.0466	0.0012	0.0505	0.0021		293.9	7.6
JEQ-2-31		0.337	0.015	0.0464	0.0013	0.0526	0.0025		292.1	8
JEQ-2-32		0.329	0.015	0.046	0.0014	0.0518	0.0019		289.8	8.4
JEQ-2-33		0.371	0.024	0.0461	0.0015	0.0584	0.0032		290.3	9.2
JEQ-2-34		0.321	0.014	0.0462	0.0011	0.0509	0.0021		291.1	6.9
JEQ-2-35		0.332	0.015	0.047	0.0016	0.0513	0.0019		296	10
JEQ-2-36		0.336	0.0086	0.0465	0.0013	0.0522	0.0013		293	8.2
JEQ-2-37		0.367	0.012	0.0458	0.0014	0.0583	0.0011		288.3	8.5
JEQ-2-38		0.381	0.024	0.0469	0.0022	0.0591	0.0018		296	14
JEQ-2-39		0.316	0.02	0.0446	0.0014	0.0526	0.0029		281.2	8.6
JEQ-2-40		0.36	0.033	0.0456	0.0029	0.0575	0.0047		288	18
DKLS-27-1		0.277	0.013	0.0398	0.0022	0.0501	0.0021		251	13
DKLS-27-2		0.2788	0.0092	0.0397	0.0014	0.0507	0.0016		251.1	8.6
DKLS-27-3		0.2774	0.0081	0.0395	0.0011	0.0509	0.001		249.9	7.1
DKLS-27-4		0.2763	0.0092	0.0396	0.0011	0.0507	0.00097		250	7
DKLS-27-5		0.2803	0.0098	0.0398	0.0016	0.0511	0.0012		251.7	9.7
DKLS-27-6		0.2834	0.0091	0.0396	0.0013	0.0515	0.0011		250.6	7.9
DKLS-27-7		0.295	0.012	0.0397	0.0013	0.0532	0.0014		250.9	8.2
DKLS-27-8		0.282	0.012	0.0401	0.0016	0.0508	0.0013		253.4	9.9
DKLS-27-9		0.2815	0.0079	0.0397	0.001	0.0517	0.0012		250.7	6.4
DKLS-27-10		0.2758	0.0082	0.0397	0.0011	0.0509	0.0013		250.7	6.7
DKLS-27-11		0.2824	0.0084	0.0396	0.0011	0.0521	0.0012		250.2	6.7
DKLS-27-12		0.2829	0.0095	0.0396	0.0013	0.052	0.0013		250.5	8.3
DKLS-27-13		0.289	0.014	0.0395	0.0022	0.0534	0.0028		250	14
DKLS-27-14		0.283	0.012	0.0396	0.0017	0.0515	0.0012		250	11
DKLS-27-15		0.2856	0.009	0.0398	0.0011	0.0522	0.0012		251.5	6.6
DKLS-27-16		0.2791	0.0097	0.0397	0.0013	0.0511	0.0012		250.8	7.9
DKLS-27-17		0.2784	0.0071	0.0396	0.0011	0.0509	0.0011		250.1	6.6
DKLS-27-18		0.2774	0.0078	0.0396	0.0011	0.05036	0.00098		250.5	6.7
DKLS-27-19		0.3	0.022	0.0396	0.0028	0.0542	0.0022		250	17
DKLS-27-20		0.278	0.011	0.0397	0.0016	0.0508	0.0013		250.8	9.9
DKLS-27-21		0.275	0.016	0.0393	0.0022	0.0507	0.0026		249	14

## Sheet: Table S6
Table S6 U-Pb data for sample JEQ-2 corrected by CT1
Comments		Ratios							Age （Ma）
		207Pb/235U	2SE	206Pb/238U	2SE	207Pb/206Pb	2SE		206Pb/238U Age	2SE
LA-MC-ICPMS @ 10 μm, 3 J·cm-2, 5 Hz
Session 1 Ta# = 0.1 ~ 0.4
JEQ-2-1		0.238466	0.00728636	0.033212	0.000943033	0.0519083	0.000569898		210.577	5.87879
JEQ-2-2		0.234702	0.012176	0.0332243	0.00160018	0.0509582	0.000622091		210.606	9.97868
JEQ-2-3		0.256053	0.00537101	0.0338859	0.000488212	0.0548026	0.000639951		214.821	3.04393
JEQ-2-4		0.238548	0.00684505	0.0330483	0.000926181	0.052198	0.000673256		209.572	5.77556
JEQ-2-5		0.256153	0.00523177	0.0324689	0.000445167	0.057184	0.000791035		205.98	2.77906
JEQ-2-6		0.250278	0.0148259	0.0330621	0.0012887	0.0543407	0.0012824		209.643	8.03633
JEQ-2-7		0.242604	0.00560824	0.0331693	0.00058218	0.0530512	0.00077791		210.342	3.62698
JEQ-2-8		0.240454	0.00388363	0.0332172	0.000518206	0.0525642	0.000809187		210.644	3.23324
JEQ-2-9		0.237782	0.0081207	0.0331745	0.00106389	0.0515249	0.000431234		210.302	6.6234
JEQ-2-10		0.241252	0.00401274	0.0332087	0.000553346	0.0525731	0.000628239		210.594	3.45051
JEQ-2-11		0.238949	0.00983168	0.0327789	0.000981545	0.0526632	0.000705049		207.901	6.12204
JEQ-2-12		0.242409	0.0118673	0.0331401	0.00171514	0.0531892	0.000609262		209.93	10.6649
JEQ-2-13		0.235505	0.0023045	0.0334086	0.000260172	0.0511192	0.000335736		211.844	1.62303
JEQ-2-14		0.235936	0.00592568	0.0330355	0.00066229	0.0518086	0.000611598		209.483	4.12948
JEQ-2-15		0.23484	0.00969778	0.0332097	0.0014007	0.0513696	0.000356478		210.365	8.71106
JEQ-2-16		0.236258	0.00272476	0.0333143	0.000252066	0.051577	0.000477623		211.256	1.57231
JEQ-2-17		0.23866	0.0101115	0.0333829	0.00133506	0.051589	0.000300288		211.465	8.27605
JEQ-2-18		0.240441	0.00668496	0.032954	0.000459462	0.0525793	0.000662177		209.006	2.8659
JEQ-2-19		0.245676	0.00970003	0.033239	0.000828771	0.0534429	0.00113119		210.738	5.1611
JEQ-2-20		0.254258	0.0133883	0.0332592	0.00129631	0.0558959	0.00113314		210.804	8.05918
JEQ-2-21		0.258643	0.00717929	0.0331585	0.000935094	0.0563631	0.00083491		210.207	5.80373
JEQ-2-22		0.240588	0.007732	0.0332193	0.00108483	0.0527754	0.000428487		210.599	6.75449
JEQ-2-23		0.239646	0.0070395	0.0333479	0.00064237	0.0521883	0.000983124		211.454	4.0046
JEQ-2-24		0.245238	0.00412909	0.0328215	0.000336524	0.0544929	0.000894419		208.178	2.09933
JEQ-2-25		0.237114	0.0116764	0.0331736	0.0015737	0.0517276	0.000569874		210.302	9.8083
JEQ-2-26		0.238434	0.00549439	0.0331617	0.00047951	0.0523232	0.00106643		210.295	2.98993
JEQ-2-27		0.234176	0.00352487	0.033029	0.000517679	0.0514362	0.000363069		209.467	3.22764
JEQ-2-28		0.237271	0.00879871	0.0332425	0.00119894	0.0517211	0.000334343		210.635	7.4745
JEQ-2-29		0.233984	0.00226807	0.0329974	0.000223638	0.0515426	0.000414386		209.278	1.39495
JEQ-2-30		0.23605	0.00658579	0.033281	0.000893028	0.0514454	0.000564723		211.022	5.57918
JEQ-2-31		0.244693	0.00724284	0.0331615	0.000738857	0.053286	0.000578385		210.27	4.60536
JEQ-2-32		0.236049	0.00660242	0.0331851	0.000853641	0.0516668	0.000520817		210.401	5.33109
JEQ-2-33		0.23617	0.00973077	0.0331999	0.00122062	0.0515281	0.000773604		210.478	7.60686
Session 2 Ta# = 0.4 ~ 0.6
JEQ-2-1		0.257424	0.00698707	0.0364196	0.000731622	0.0511034	0.000720149		230.586	4.54763
JEQ-2-2		0.260747	0.00366716	0.0365045	0.000343804	0.0518756	0.000604438		231.126	2.13768
JEQ-2-3		0.257872	0.00379005	0.0362615	0.000427174	0.0515539	0.00058404		229.613	2.65672
JEQ-2-4		0.256725	0.00427473	0.0364606	0.000586256	0.0510367	0.000335423		230.839	3.64495
JEQ-2-5		0.257238	0.00280047	0.0363591	0.000373396	0.0513232	0.000325716		230.221	2.32316
JEQ-2-6		0.261359	0.00596227	0.0367122	0.000687565	0.0513374	0.000607203		232.399	4.27979
JEQ-2-7		0.259455	0.00414229	0.0362441	0.000261095	0.0519818	0.000833591		229.508	1.6244
JEQ-2-8		0.264876	0.00745776	0.0366019	0.00039892	0.0525917	0.00156554		231.734	2.48081
JEQ-2-9		0.256229	0.00670398	0.0362813	0.000762491	0.0510751	0.000855059		229.727	4.74483
JEQ-2-10		0.258184	0.00701649	0.0365902	0.000962427	0.0512799	0.000311492		231.583	5.97982
JEQ-2-11		0.257715	0.0054117	0.0364664	0.000499179	0.0512132	0.000711026		230.887	3.1034
JEQ-2-12		0.256742	0.00352898	0.0364484	0.000466495	0.0511633	0.000267641		230.765	2.90207
Session 3 Ta# = 0.6 ~ 0.9
JEQ-2-1		0.28574	0.00474472	0.0395649	0.000369427	0.0524394	0.00074306		250.132	2.29036
JEQ-2-2		0.281955	0.00624815	0.0395619	0.000457576	0.0516649	0.000787408		250.111	2.83621
JEQ-2-3		0.288055	0.00502422	0.0397117	0.000470136	0.0527715	0.000821937		251.036	2.91353
JEQ-2-4		0.287163	0.00424911	0.0396986	0.000545121	0.0525077	0.00039642		250.954	3.38008
JEQ-2-5		0.283376	0.00746531	0.0396488	0.000984327	0.0516154	0.000318104		250.581	6.11038
JEQ-2-6		0.279532	0.00591126	0.0394633	0.000582006	0.0514426	0.00063592		249.493	3.60611
JEQ-2-7		0.287804	0.00503058	0.0394348	0.00037941	0.0528155	0.000678921		249.323	2.35166
JEQ-2-8		0.287477	0.0065097	0.0395292	0.000659315	0.052664	0.00067766		249.9	4.0874
JEQ-2-9		0.290141	0.0065106	0.0395674	0.000864056	0.0531116	0.000496337		250.078	5.34728
JEQ-2-10		0.282054	0.00668386	0.039682	0.00085898	0.0514695	0.000699155		250.818	5.32988
JEQ-2-11		0.285498	0.0046255	0.0393653	0.000388956	0.0526496	0.000476381		248.895	2.41183
JEQ-2-12		0.285584	0.00776083	0.0397266	0.000889836	0.0520423	0.000629112		251.089	5.51853
JEQ-2-13		0.279249	0.00520024	0.0396152	0.000731119	0.0510678	0.000210513		250.419	4.52864
JEQ-2-14		0.281733	0.00832943	0.0396117	0.00116485	0.0517802	0.000445405		250.267	7.21655
JEQ-2-15		0.278301	0.00734994	0.0396974	0.000865724	0.0508738	0.000732181		250.93	5.37114
CT3-1		6.5596	0.11348	0.374471	0.00668178	0.127027	0.000457869		2049.8	31.2764
CT3-2		6.39251	0.0759678	0.372998	0.0043609	0.124066	0.000490584		2043.23	20.4967
CT3-3		6.57936	0.107593	0.374286	0.00567752	0.127564	0.00049803		2049.26	26.6162
CT3-4		6.43257	0.248818	0.374963	0.0137431	0.124635	0.000734998		2047.57	62.7648
CT3-5		6.509	0.177863	0.374584	0.0102622	0.125766	0.00033794		2046.89	47.3587
CT3-6		6.60122	0.324347	0.375851	0.0169835	0.127196	0.000617356		2052.32	79.7109
CT3-7		6.60858	0.111367	0.374953	0.00501609	0.12806	0.000627871		2052.35	23.4328
CT3-8		6.53136	0.086896	0.374807	0.0049192	0.126695	0.00045069		2051.63	23.0636
CT3-9		6.54642	0.103272	0.374788	0.00634257	0.126962	0.000380807		2051.03	29.785
CT3-10		6.53826	0.092551	0.374189	0.00520639	0.126823	0.000329875		2048.43	24.3726
CT3-11		6.46442	0.0510683	0.369466	0.00348386	0.126785	0.000646792		2026.84	16.4404
CT3-12		6.49347	0.0959118	0.374533	0.00553468	0.125816	0.000363502		2049.55	25.9432
CT3-13		6.16168	0.304522	0.376101	0.0132974	0.116551	0.0021209		2049.42	63.8437
CT3-14		6.54484	0.0649197	0.374605	0.0040705	0.126807	0.000400178		2050.45	19.1615
CT3-15		6.5707	0.159053	0.37556	0.00911011	0.126612	0.000228988		2048.75	42.9005
CT3-16		6.58332	0.0731426	0.374387	0.00375129	0.127107	0.00056222		2049.7	17.5407
CT3-17		6.57137	0.0906636	0.375014	0.00502218	0.127057	0.000336791		2052.13	23.4554
CT3-18		6.50947	0.180144	0.375634	0.00985417	0.125583	0.000349799		2049.79	45.8949
CT3-19		6.55021	0.116701	0.374749	0.00656929	0.126677	0.00030324		2049.39	31.0102
CT3-20		6.57129	0.144793	0.375681	0.00828072	0.126924	0.000262006		2051.75	38.686

## Sheet: PlotDat34
Source sheet	Table S5	0.493	0.0619	0.421825	0.057	0.425533	0.0574338	0.51503	0.0628578	0.527701	0.064157	0.73497	0.0649493	0.501134	0.0626853	0.523134	0.0625853	0.50703	0.0629837	0.581821	0.0615778	0.543373	0.0636783
Plot name	Concordia34	0.502	0.0632	0.421825	0.057	0.43257	0.0582543	0.51472	0.0630539	0.527343	0.0643531	0.734381	0.0651687	0.500747	0.0629096	0.522747	0.0628096	0.506721	0.0631647	0.581377	0.0618192	0.542962	0.0639196
Plot Type	1	0.675	0.0637	0.424759	0.0573433	0.439642	0.0590754	0.513818	0.0632184	0.526293	0.0645178	0.732637	0.0653595	0.499628	0.0630854	0.521628	0.0629854	0.505821	0.0633167	0.580078	0.0620219	0.541761	0.0641223
1st free col	25	0.484	0.0618	0.427699	0.0576866	0.446749	0.0598971	0.512348	0.063347	0.524581	0.0646466	0.729771	0.065518	0.497826	0.063205	0.519826	0.063105	0.504352	0.0634355	0.577958	0.0621804	0.539803	0.0642807
Sigma Level	2	0.506	0.0617	0.430645	0.0580301	0.45389	0.0607196	0.510351	0.0634362	0.522253	0.0647359	0.725839	0.0656411	0.49542	0.0632632	0.51742	0.0631632	0.502356	0.0635179	0.575075	0.0622903	0.537141	0.0643905
Absolute Errs	TRUE	0.485	0.0621	0.433597	0.0583737	0.461067	0.0615426	0.50788	0.0634834	0.519372	0.0647833	0.720917	0.0657265	0.492515	0.0632575	0.514515	0.0631575	0.499886	0.0635615	0.571509	0.0623487	0.533848	0.0644487
Symbol Type	1	0.55	0.0604	0.436556	0.0587174	0.46828	0.0623663	0.505003	0.0634874	0.516018	0.0647875	0.715102	0.0657724	0.489237	0.063188	0.511237	0.063088	0.49701	0.0635654	0.567356	0.0623539	0.530013	0.0644538
Inverse Plot	FALSE	0.514	0.0625	0.43952	0.0590612	0.475528	0.0631906	0.501799	0.0634482	0.512281	0.0647484	0.708506	0.0657779	0.485731	0.0630579	0.507731	0.0629579	0.493806	0.0635292	0.562729	0.0623058	0.525742	0.0644056
Color Plot	TRUE	IsoLine	IsoLine	0.442491	0.0594052	0.482812	0.0640155	0.498354	0.0633667	0.508263	0.0646671	0.701258	0.065743	0.482149	0.0628728	0.504149	0.0627728	0.490362	0.0634541	0.557755	0.0622057	0.52115	0.0643054
3D plot	FALSE			0.445467	0.0597492	0.490131	0.0648411	0.494764	0.0632452	0.504075	0.0645458	0.693499	0.0656684	0.478648	0.0626409	0.500648	0.0625409	0.486772	0.063342	0.55257	0.0620563	0.516363	0.064156
Linear	FALSE			0.44845	0.0600934	0.497487	0.0656674	0.491126	0.063087	0.49983	0.0643877	0.68538	0.0655554	0.475381	0.0623721	0.497381	0.0622721	0.483134	0.0631961	0.547315	0.0618618	0.511512	0.0639614
Data Range	C60:F67			0.451439	0.0604376	0.504879	0.0664943	0.487538	0.0628964	0.495645	0.0641973	0.677058	0.0654063	0.47249	0.0620784	0.49449	0.0619784	0.479546	0.0630202	0.542132	0.0616274	0.506729	0.0637269
Filled Symbols	FALSE			0.454434	0.060782	IsoLine	IsoLine	0.4841	0.0626787	0.491633	0.0639796	0.668697	0.065224	0.470103	0.0617725	0.492103	0.0616725	0.476108	0.0628193	0.537165	0.0613595	0.502144	0.063459
ConcAge	TRUE			0.457435	0.0611265			0.480905	0.0624397	0.487903	0.0637407	0.660458	0.0650121	0.468323	0.0614678	0.490323	0.0613678	0.472912	0.0625987	0.532547	0.0610655	0.497882	0.0631649
ConcSwap	FALSE			0.460443	0.0614711			0.478039	0.062186	0.484558	0.063487	0.652503	0.0647746	0.467228	0.0611776	0.489228	0.0610776	0.470045	0.0623645	0.528406	0.0607533	0.49406	0.0628527
1st Symbol-row	1			0.463457	0.0618158			0.475582	0.0619245	0.481689	0.0632255	0.644985	0.0645162	0.466866	0.0609147	0.488866	0.0608147	0.467587	0.0621231	0.524853	0.0604315	0.490782	0.0625308
				0.466477	0.0621607			0.473599	0.0616623	0.479374	0.0629633	0.638052	0.0642419	0.467253	0.0606904	0.489253	0.0605904	0.465603	0.0618811	0.521987	0.0601088	0.488137	0.0622082
				0.469503	0.0625056			0.472146	0.0614066	0.477676	0.0627076	0.631837	0.0639571	0.468372	0.0605146	0.490372	0.0604146	0.464149	0.0616451	0.519885	0.059794	0.486198	0.0618934
				0.472535	0.0628506			0.471262	0.0611644	0.476641	0.0624653	0.626463	0.0636672	0.470174	0.060395	0.492174	0.060295	0.463263	0.0614214	0.518604	0.0594958	0.485017	0.0615952
				0.475574	0.0631958			0.47097	0.0609422	0.476299	0.062243	0.622034	0.063378	0.47258	0.0603368	0.49458	0.0602368	0.46297	0.0612163	0.518179	0.0592222	0.484627	0.0613217
				0.478619	0.0635411			0.47128	0.0607461	0.476657	0.0620469	0.618635	0.0630951	0.475485	0.0603425	0.497485	0.0602425	0.463279	0.0610353	0.518623	0.0589808	0.485038	0.0610804
				0.48167	0.0638865			0.472182	0.0605816	0.477707	0.0618822	0.616333	0.0628239	0.478763	0.060412	0.500763	0.060312	0.464179	0.0608833	0.519922	0.0587781	0.486239	0.0608777
				0.484727	0.064232			0.473652	0.060453	0.479419	0.0617534	0.615174	0.0625698	0.482269	0.0605421	0.504269	0.0604421	0.465648	0.0607645	0.522042	0.0586196	0.488197	0.0607193
				0.487791	0.0645776			0.475649	0.0603638	0.481747	0.0616641	0.615179	0.0623377	0.485851	0.0607272	0.507851	0.0606272	0.467644	0.0606821	0.524925	0.0585097	0.490859	0.0606095
				0.490861	0.0649233			0.47812	0.0603166	0.484628	0.0616167	0.616348	0.0621321	0.489352	0.0609591	0.511352	0.0608591	0.470114	0.0606385	0.528491	0.0584513	0.494152	0.0605513
				0.493938	0.0652691			0.480997	0.0603126	0.487982	0.0616125	0.618659	0.061957	0.492619	0.0612279	0.514619	0.0611279	0.47299	0.0606346	0.532644	0.0584461	0.497987	0.0605462
				0.497021	0.0656151			0.484201	0.0603518	0.491719	0.0616516	0.622066	0.0618158	0.49551	0.0615216	0.51751	0.0614216	0.476194	0.0606708	0.537271	0.0584942	0.502258	0.0605944
				0.50011	0.0659611			0.487646	0.0604333	0.495737	0.0617329	0.626504	0.0617114	0.497897	0.0618275	0.519897	0.0617275	0.479638	0.0607459	0.542245	0.0585943	0.50685	0.0606946
				0.503205	0.0663073			0.491236	0.0605548	0.499925	0.0618542	0.631885	0.0616456	0.499677	0.0621322	0.521677	0.0620322	0.483228	0.060858	0.54743	0.0587437	0.511637	0.060844
				0.506307	0.0666536			0.494874	0.060713	0.50417	0.0620123	0.638106	0.0616198	0.500772	0.0624224	0.522772	0.0623224	0.486866	0.0610039	0.552685	0.0589382	0.516488	0.0610386
				0.509416	0.067			0.498462	0.0609036	0.508355	0.0622027	0.645045	0.0616345	0.501134	0.0626853	0.523134	0.0625853	0.490454	0.0611798	0.557868	0.0591726	0.521271	0.0612731
				0.509416	0.067			0.5019	0.0611213	0.512367	0.0624204	0.652567	0.0616894					0.493892	0.0613807	0.562835	0.0594405	0.525856	0.061541
				IsoLine	IsoLine			0.505095	0.0613603	0.516097	0.0626593	0.660526	0.0617834					0.497088	0.0616013	0.567453	0.0597345	0.530118	0.0618351
								0.507961	0.061614	0.519442	0.062913	0.668766	0.0619148					0.499955	0.0618355	0.571594	0.0600467	0.53394	0.0621473
								0.510418	0.0618755	0.522311	0.0631745	0.677128	0.0620809					0.502413	0.0620769	0.575147	0.0603685	0.537218	0.0624692
								0.512401	0.0621377	0.524626	0.0634367	0.685448	0.0622785					0.504397	0.0623189	0.578013	0.0606912	0.539863	0.0627918
								0.513854	0.0623934	0.526324	0.0636924	0.693565	0.0625037					0.505851	0.0625549	0.580115	0.061006	0.541802	0.0631066
								0.514738	0.0626356	0.527359	0.0639347	0.70132	0.0627523					0.506737	0.0627786	0.581396	0.0613042	0.542983	0.0634048
								0.51503	0.0628578	0.527701	0.064157	0.708563	0.0630193					0.50703	0.0629837	0.581821	0.0615778	0.543373	0.0636783
												0.715153	0.0632995
												0.720962	0.0635876
												0.725876	0.0638778
												0.729799	0.0641646
												0.732656	0.0644423
												0.734391	0.0647056
												0.73497	0.0649493
